# Supplementary material
Source: PubMed Central journal article supplement (PMC4183829)
Supplement: supp_M114.573402_jbc.M114.573402-1.pdf [file supp_M114.573402_jbc.M114.573402-1.pdf]

| CELL LINE-JESTOM |                       |                                                          |             |                                                        |               |
|------------------|-----------------------|----------------------------------------------------------|-------------|--------------------------------------------------------|---------------|
| Allele           | Peptide               | Modification                                             | Accession   | Protein                                                | Confidence    |
| HLA-DR1          | TGKLVLSAQNLVDCS       | [Dioxidation(C)@15]                                      | CATS_HUMAN  | Cathepsin S                                            | 97.54 -0.0048 |
| HLA-DR1          | KTGKLVLSAQNLVDCS      | [Dioxidation(C)@16]                                      | CATS_HUMAN  | Cathepsin S                                            | 99 -0.0158    |
| HLA-DR1          | TGKLVLSAQNLVDCS       | [Glutathione(C)@15]                                      | CATS_HUMAN  | Cathepsin S                                            | 97.54 -0.0048 |
| HLA-DR1          | KTGKLVLSAQNLVDCS      | [Glutathione(C)@16]                                      | CATS_HUMAN  | Cathepsin S                                            | 99 -0.0021    |
| HLA-DR1          | YCGSCWAHASTSAMADRINIK | [Cys->Dha(C)@2; Dioxidation(C)@5]                        | CATZ_HUMAN  | Cathepsin Z                                            | 99 -0.0188    |
| HLA-DR1          | VTGFKCVTGMSCLMR       | [Cys->Dha(C)@6; Dioxidation(C)@12]                       | CEGT_HUMAN  | Ceramide glucosyltransferase                           | 99 -0.0174    |
| HLA-DR1          | GRWEFKCQHGEIECKFN     | [Cys->Dha(C)@7; Dioxidation(C)@14]                       | GILT_HUMAN  | Gamma-interferon-inducible lysosomal thiol reductase   | 97.42 -0.0175 |
| HLA-DR1          | PLCLQYAPGLSPDT        | [Dehydro(C)@3]                                           | GILT_HUMAN  | Gamma-interferon-inducible lysosomal thiol reductase   | 99 0.0411     |
| HLA-DR1          | GRWEFKCQHGEIECKFN     | [Dioxidation(C)@7; Cys->Dha(C)@14]                       | GILT_HUMAN  | Gamma-interferon-inducible lysosomal thiol reductase   | 99 -0.0253    |
| HLA-DR1          | YDNSLKIISNASCSTTNC    | [Cys->Dha(C)@13; Dioxidation(C)@17]                      | G3P_HUMAN   | Glyceraldehyde-3-phosphate dehydrogenase               | 99 -0.0221    |
| HLA-DR1          | AVGSLCALSASLLGSM      | [Trioxidation(C)@6]                                      | CTR1_HUMAN  | High affinity cationic amino acid transporter 1        | 95.5 0.0166   |
| HLA-DR1          | APCEFGVLSLANVLSQH     | [Trioxidation(C)@3]                                      | DMB_HUMAN   | HLA class II histocompatibility antigen, DM beta chain | 98.38 -0.0309 |
| HLA-DR1          | KGDTFSCMVGHEAL        | [Oxidation(C)@7]                                         | IGHA2_HUMAN | Ig alpha-2 chain C region                              | 96.14 0.0053  |
| HLA-DR1          | TPVEAQVRLYPTSCHTACT   | [Cys->Dha(C)@15; Dioxidation(C)@19]                      | MFGM_HUMAN  | Lactadherin                                            | 99 -0.0203    |
| HLA-DR1          | TPVEAQVRLYPTSCHTAC    | [Cys->Dha(C)@15; Dioxidation(C)@19]                      | MFGM_HUMAN  | Lactadherin                                            | 99 -0.0297    |
| HLA-DR1          | AATQFEPLAARSAFPC      | [Glutathione(C)@16]                                      | LCAP_HUMAN  | Leucyl-cystinyl aminopeptidase                         | 95.86 -0.0013 |
| HLA-DR1          | GCQYLCLPAPQINPH       | [Cys->Dha(C)@2; Dioxidation(C)@6]                        | LDLR_HUMAN  | Low-density lipoprotein receptor                       | 98.37 -0.0196 |
| HLA-DR1          | GCQYLCLPAPQINPHSPK    | [Cys->Dha(C)@2; Dioxidation(C)@6]                        | LDLR_HUMAN  | Low-density lipoprotein receptor                       | 99 -0.0203    |
| HLA-DR1          | FEFHCLSGECIHSS        | [Cys->Dha(C)@5; Dioxidation(C)@10]                       | LDLR_HUMAN  | Low-density lipoprotein receptor                       | 99 -0.0197    |
| HLA-DR1          | FEFHCLSGECIHSSW       | [Cys->Dha(C)@5; Dioxidation(C)@10]                       | LDLR_HUMAN  | Low-density lipoprotein receptor                       | 94.53 -0.0161 |
| HLA-DR1          | AFEFHCLSGECIHSS       | [Cys->Dha(C)@6; Dioxidation(C)@11]                       | LDLR_HUMAN  | Low-density lipoprotein receptor                       | 98.62 -0.0185 |
| HLA-DR1          | ERNEFQCQDQKCSYK       | [Cys->Dha(C)@7; Dioxidation(C)@12]                       | LDLR_HUMAN  | Low-density lipoprotein receptor                       | 94.16 -0.0155 |
| HLA-DR1          | SAFEFHCLSGECIHSS      | [Cys->Dha(C)@7; Dioxidation(C)@12]                       | LDLR_HUMAN  | Low-density lipoprotein receptor                       | 95.27 -0.0172 |
| HLA-DR1          | SAFEFHCLSGECIHSSWR    | [Cys->Dha(C)@7; Dioxidation(C)@12]                       | LDLR_HUMAN  | Low-density lipoprotein receptor                       | 96.82 -0.0217 |
| HLA-DR1          | SAFEFHCLSGECIHSSW     | [Cys->Dha(C)@7; Dioxidation(C)@12]                       | LDLR_HUMAN  | Low-density lipoprotein receptor                       | 99 -0.0187    |
| HLA-DR1          | EFHCLSGECIHSS         | [Glu->pyro-Glu@N-term; Oxidation(C)@9]                   | LDLR_HUMAN  | Low-density lipoprotein receptor                       | 97.61 0.0042  |
| HLA-DR1          | SNLYCLKPTICSDQD       | [Cys->Dha(C)@5; Dioxidation(C)@11]                       | LY6E_HUMAN  | Lymphocyte antigen 6E                                  | 98.83 -0.0201 |
| HLA-DR1          | KSNLYCLKPTICSDQD      | [Cys->Dha(C)@6; Dioxidation(C)@12]                       | LY6E_HUMAN  | Lymphocyte antigen 6E                                  | 96.1 -0.02    |
| HLA-DR1          | KSNLYCLKPTICSDQDN     | [Cys->Dha(C)@6; Dioxidation(C)@12]                       | LY6E_HUMAN  | Lymphocyte antigen 6E                                  | 99 -0.0364    |
| HLA-DR1          | KSNLYCLKPTICS         | [Cys->Dha(C)@6; Dioxidation(P)@9]                        | LY6E_HUMAN  | Lymphocyte antigen 6E                                  | 94.67 -0.0188 |
| HLA-DR1          | KSNLYCLKPTICSD        | [Cys->Dha(C)@6; Dioxidation(P)@9]                        | LY6E_HUMAN  | Lymphocyte antigen 6E                                  | 98.48 -0.0206 |
| HLA-DR1          | QKSNLYCLKPTICSDQD     | [Cys->Dha(C)@7; Dioxidation(C)@13]                       | LY6E_HUMAN  | Lymphocyte antigen 6E                                  | 95.68 -0.0061 |
| HLA-DR1          | QKSNLYCLKPTICSDQDN    | [Cys->Dha(C)@7; Dioxidation(C)@13]                       | LY6E_HUMAN  | Lymphocyte antigen 6E                                  | 97.24 -0.013  |
| HLA-DR1          | NQKSNLYCLKPTICSDQD    | [Cys->Dha(C)@8; Dioxidation(C)@14]                       | LY6E_HUMAN  | Lymphocyte antigen 6E                                  | 99 -0.0134    |
| HLA-DR1          | NQKSNLYCLKPTICSDQDN   | [Cys->Dha(C)@8; Dioxidation(C)@14]                       | LY6E_HUMAN  | Lymphocyte antigen 6E                                  | 99 -0.0175    |
| HLA-DR1          | KSNLYCLKPTICSDQDN     | [Dioxidation(C)@6; Cys->Dha(C)@12]                       | LY6E_HUMAN  | Lymphocyte antigen 6E                                  | 99 -0.0157    |
| HLA-DR1          | KSNLYCLKPTICSDQDNY    | [Dioxidation(C)@6; Cys->Dha(C)@12]                       | LY6E_HUMAN  | Lymphocyte antigen 6E                                  | 99 -0.0197    |
| HLA-DR1          | QKSNLYCLKPTICSD       | [Gln->pyro-Glu@N-term; Cys->Dha(C)@7; Dioxidation(C)@13] | LY6E_HUMAN  | Lymphocyte antigen 6E                                  | 95.47 -0.0174 |
| HLA-DR1          | QKSNLYCLKPTICSDQD     | [Gln->pyro-Glu@N-term; Cys->Dha(C)@7; Dioxidation(C)@13] | LY6E_HUMAN  | Lymphocyte antigen 6E                                  | 95.68 -0.0061 |
| HLA-DR1          | QKSNLYCLKPTICSDQDN    | [Gln->pyro-Glu@N-term; Cys->Dha(C)@7; Dioxidation(C)@13] | LY6E_HUMAN  | Lymphocyte antigen 6E                                  | 99 -0.0262    |
| HLA-DR1          | NRLWSSLQTHCCSQNK      | [Cys->Dha(C)@11; Dioxidation(C)@12]                      | PPGB_HUMAN  | Lysosomal protective protein                           | 97.4 -0.0119  |
| HLA-DR1          | QPPEIRTLEGSSAFLPCS    | [Gln->pyro-Glu@N-term; Dioxidation(C)@17]                | NCTR3_HUMAN | Natural cytotoxicity triggering receptor 3             | 99 -0.0139    |
| HLA-DR1          | KYILCCLLGHAIHGL       | [Cys->Dha(C)@5; Dioxidation(C)@6]                        | AAAT_HUMAN  | Neutral amino acid transporter B(0)                    | 99 -0.0177    |
| HLA-DR1          | DCGKIEVEKPFIAIAKE     | [Dioxidation(C)@2]                                       | PPIB_HUMAN  | Peptidyl-prolyl cis-trans isomerase B                  | 99 -0.0026    |
| HLA-DR1          | DCGKIEVEKPFIAIAKE     | [Glutathione(C)@2]                                       | PPIB_HUMAN  | Peptidyl-prolyl cis-trans isomerase B                  | 99 0.0068     |
| HLA-DR1          | DCGKIEVEKPFIAIAK      | [Trioxidation(C)@2]                                      | PPIB_HUMAN  | Peptidyl-prolyl cis-trans isomerase B                  | 99 -0.0051    |
| HLA-DR1          | DCGKIEVEKPFIAIAKE     | [Trioxidation(C)@2]                                      | PPIB_HUMAN  | Peptidyl-prolyl cis-trans isomerase B                  | 97.83 0.0444  |
| HLA-DR1          | ADCGKIEVEKPFIAIAK     | [Trioxidation(C)@3]                                      | PPIB_HUMAN  | Peptidyl-prolyl cis-trans isomerase B                  | 98.4 -0.022   |
| HLA-DR1          | ADCGKIEVEKPFIAIAKE    | [Trioxidation(C)@3]                                      | PPIB_HUMAN  | Peptidyl-prolyl cis-trans isomerase B                  | 99 -0.0188    |
| HLA-DR1          | ATGKMLSLAEQQLVDCAQD   | [Cys->Dha(C)@16; Cation:K(D)@19]                         | CATH_HUMAN  | Pro-cathepsin H                                        | 99 0.0072     |

|         |                                |                                         |             |                                                          |       |         |
|---------|--------------------------------|-----------------------------------------|-------------|----------------------------------------------------------|-------|---------|
| HLA-DR1 | ATGKMLSLAEQQLVDCAQDFNNHGCG     | [Cys->Dha(C)@16; Dioxidation(C)@25]     | CATH_HUMAN  | Pro-cathepsin H                                          | 99    | -0.0158 |
| HLA-DR1 | IATGKMLSLAEQQLVDCAQDFNNHGCG    | [Cys->Dha(C)@17; Dioxidation(C)@26]     | CATH_HUMAN  | Pro-cathepsin H                                          | 99    | -0.0232 |
| HLA-DR1 | TGKMLSLAEQQLVDCA               | [Glutathione(C)@15]                     | CATH_HUMAN  | Pro-cathepsin H                                          | 97.9  | -0.0142 |
| HLA-DR1 | ATGKMLSLAEQQLVDCA              | [Glutathione(C)@16]                     | CATH_HUMAN  | Pro-cathepsin H                                          | 99    | 0.0143  |
| HLA-DR1 | IATGKMLSLAEQQLVDCAQDFNNHGCG    | [Oxidation(C)@26]                       | CATH_HUMAN  | Pro-cathepsin H                                          | 99    | -0.0009 |
| HLA-DR1 | ATGKMLSLAEQQLVDCAQ             | [Trioxidation(C)@16]                    | CATH_HUMAN  | Pro-cathepsin H                                          | 98.46 | -0.0154 |
| HLA-DR1 | LPVILDIKIGEMSRPGEVCS           | [Dioxidation(C)@19]                     | SAP_HUMAN   | Proactivator polypeptide                                 | 99    | -0.0199 |
| HLA-DR1 | IPRFWTFETGCTVCDEGLR            | [Cys->Dha(C)@11; Dioxidation(C)@14]     | PLOD1_HUMAN | Procollagen-lysine,2-oxoglutarate 5-dioxygenase 1        | 99    | -0.0212 |
| HLA-DR1 | VVKELRKMGLNEICLC               | [Cys->Dha(C)@14; Dioxidation(C)@16]     | RAB21_HUMAN | Ras-related protein Rab-21                               | 98.52 | -0.0024 |
| HLA-DR1 | IPADLRIISANGKVDNS              | [Dioxidation(C)@13]                     | AT1A1_HUMAN | Sodium/potassium-transporting ATPase subunit alpha-1     | 96.85 | 0.0002  |
| HLA-DR1 | STCQIAQEIAEKIQQRN              | [Dioxidation(C)@3]                      | STX8_HUMAN  | Syntaxin-8                                               | 99    | -0.0152 |
| HLA-DR1 | STCQIAQEIAEKIQQR               | [Dioxidation(C)@3]                      | STX8_HUMAN  | Syntaxin-8                                               | 99    | -0.0232 |
| HLA-DR1 | GVGYVPITGMPAVCS                | [Dioxidation(C)@14]                     | TOLIP_HUMAN | Toll-interacting protein                                 | 95.63 | -0.021  |
| HLA-DR1 | YPKEEELYACQRGCRFLFSIC          | [Cys->Dha(C)@14; Dioxidation(C)@20]     | TMM59_HUMAN | Transmembrane protein 59                                 | 99    | -0.0224 |
| HLA-DR1 | VQKWLLAAGAQKC                  | [GlnThrGlyGly(C)@13]                    | TPP1_HUMAN  | Tripeptidyl-peptidase 1                                  | 97.75 | -0.049  |
| HLA-DQ5 | DGGNKVVISGFGDPLICDNQVS         | [Dioxidation(C)@17]                     | AGRIN_HUMAN | Agrin                                                    | 99    | -0.025  |
| HLA-DQ5 | SGKLYCFQDGDYFYEK               | [Dioxidation(C)@6]                      | BT3A3_HUMAN | Butyrophilin subfamily 3 member A3                       | 98.99 | -0.0097 |
| HLA-DQ5 | SPEKGAETWFDSYDCSKF             | [Trioxidation(C)@15]                    | CLN5_HUMAN  | Ceroid-lipofuscinosis neuronal protein 5                 | 99    | 0.0051  |
| HLA-DQ5 | SPEKGAETWFDSYDCSK              | [Trioxidation(C)@15]                    | CLN5_HUMAN  | Ceroid-lipofuscinosis neuronal protein 5                 | 98.73 | 0.0112  |
| HLA-DQ5 | RPKDKMCDLEEFCDGRHP             | [Dioxidation(C)@7; Cys->Dha(C)@13]      | ADAM8_HUMAN | Disintegrin and metalloproteinase domain-containing prot | 99    | -0.0167 |
| HLA-DQ5 | HLCDFLETHFLDEEVKLIK            | [Delta:H(2)C(2)(H)@1; Glutathione(C)@3] | FRIL_HUMAN  | Ferritin light chain                                     | 99    | 0.0018  |
| HLA-DQ5 | HLCDFLETHFLDEEVK               | [Delta:H(2)C(2)(H)@1; Glutathione(C)@3] | FRIL_HUMAN  | Ferritin light chain                                     | 95.8  | 0.0042  |
| HLA-DQ5 | GPSKAEISCTDNQDGTCSV            | [Dioxidation(C)@9; Deamidated(N)@12]    | FLNA_HUMAN  | Filamin-A                                                | 95.87 | 0.0451  |
| HLA-DQ5 | VNSQYHFTDEYLECVS               | [Dioxidation(C)@14]                     | GPC4_HUMAN  | Glypican-4                                               | 97.15 | -0.0011 |
| HLA-DQ5 | HPISDHEATLRCWALG               | [Cys->Dha(C)@12; Oxidation(W)@13]       | 1B27_HUMAN  | HLA class I histocompatibility antigen, B-27 alpha chain | 99    | -0.0168 |
| HLA-DQ5 | HPDQETYTDYVIPCFDS              | [Dioxidation(C)@14]                     | LPPRC_HUMAN | Leucine-rich PPR motif-containing protein, mitochondrial | 98.83 | -0.0319 |
| HLA-DQ5 | TFDQTAWGDSGVVYCS               | [Dioxidation(C)@15]                     | LSR_HUMAN   | Lipolysis-stimulated lipoprotein receptor                | 94.73 | -0.0161 |
| HLA-DQ5 | CDRKLGAWVCDRL                  | [Dioxidation(C)@1; Cys->Dha(C)@10]      | FCER2_HUMAN | Low affinity immunoglobulin epsilon Fc receptor          | 99    | -0.0119 |
| HLA-DQ5 | SGRWNDAFCDRKLGAWV              | [Dioxidation(C)@9]                      | FCER2_HUMAN | Low affinity immunoglobulin epsilon Fc receptor          | 94.8  | -0.0152 |
| HLA-DQ5 | DRKLGAWVCDRL                   | [Dioxidation(C)@9]                      | FCER2_HUMAN | Low affinity immunoglobulin epsilon Fc receptor          | 94.86 | -0.0388 |
| HLA-DQ5 | CDRKLGAWVCDRLAT                | [Dioxidation(R)@3; Cys->Dha(C)@10]      | FCER2_HUMAN | Low affinity immunoglobulin epsilon Fc receptor          | 97.47 | -0.0183 |
| HLA-DQ5 | SGRWNDAFCDRKLGAWV              | [Oxidation(C)@9]                        | FCER2_HUMAN | Low affinity immunoglobulin epsilon Fc receptor          | 99    | -0.0413 |
| HLA-DQ5 | CDRKLGAWVCDRL                  | [Trioxidation(C)@1]                     | FCER2_HUMAN | Low affinity immunoglobulin epsilon Fc receptor          | 98.57 | 0.0055  |
| HLA-DQ5 | CDRKLGAWVCDRLA                 | [Trioxidation(C)@1]                     | FCER2_HUMAN | Low affinity immunoglobulin epsilon Fc receptor          | 99    | 0.0021  |
| HLA-DQ5 | CDRKLGAWVCDRLAT                | [Trioxidation(C)@1]                     | FCER2_HUMAN | Low affinity immunoglobulin epsilon Fc receptor          | 99    | 0.0028  |
| HLA-DQ5 | GRWNDAFCDRKLGA                 | [Trioxidation(C)@8]                     | FCER2_HUMAN | Low affinity immunoglobulin epsilon Fc receptor          | 94.36 | 0.013   |
| HLA-DQ5 | SGRWNDAFCDRKLGA                | [Trioxidation(C)@9]                     | FCER2_HUMAN | Low affinity immunoglobulin epsilon Fc receptor          | 96.99 | -0.0138 |
| HLA-DQ5 | DRKLGAWVCDRLA                  | [Trioxidation(C)@9]                     | FCER2_HUMAN | Low affinity immunoglobulin epsilon Fc receptor          | 97.87 | -0.032  |
| HLA-DQ5 | ARDCRDWSDEPIK                  | [Dioxidation(C)@4; Oxidation(R)@5]      | LDLR_HUMAN  | Low-density lipoprotein receptor                         | 98.88 | -0.0002 |
| HLA-DQ5 | ARDCRDWSDEPIK                  | [Trioxidation(C)@4]                     | LDLR_HUMAN  | Low-density lipoprotein receptor                         | 98.88 | -0.0002 |
| HLA-DQ5 | CSQNKCNFYDNKDLE                | [Oxidation(C)@6]                        | PPGB_HUMAN  | Lysosomal protective protein                             | 97.4  | -0.0266 |
| HLA-DQ5 | IPCKLQSGTHCLWTDQLLQGSE         | [Cys->Dha(C)@3; Dioxidation(C)@11]      | TIMP1_HUMAN | Metalloproteinase inhibitor 1                            | 95.43 | -0.0075 |
| HLA-DQ5 | IPCKLQSGTHCLWTDQLLQGSEKGFQSRHL | [Cys->Dha(C)@3; Dioxidation(C)@11]      | TIMP1_HUMAN | Metalloproteinase inhibitor 1                            | 99    | -0.0129 |
| HLA-DQ5 | SIPCKLQSGTHCLWTDQLLQGSE        | [Cys->Dha(C)@4; Dioxidation(C)@12]      | TIMP1_HUMAN | Metalloproteinase inhibitor 1                            | 99    | -0.0136 |
| HLA-DQ5 | IPCKLQSGTHCLWTDQLLQGSEK        | [Dioxidation(C)@3; Cys->Dha(C)@11]      | TIMP1_HUMAN | Metalloproteinase inhibitor 1                            | 95.17 | -0.0172 |
| HLA-DQ5 | LQSGTHCLWTDQLLQGSE             | [Dioxidation(C)@7]                      | TIMP1_HUMAN | Metalloproteinase inhibitor 1                            | 96.81 | -0.0198 |
| HLA-DQ5 | IPCKLQSGTHCLWTDQLLQGSEK        | [Oxidation(C)@3; Dehydrated(T)@9]       | TIMP1_HUMAN | Metalloproteinase inhibitor 1                            | 99    | 0.0118  |
| HLA-DQ5 | QSGTHCLWTDQLLQGSE              | [Trioxidation(C)@6]                     | TIMP1_HUMAN | Metalloproteinase inhibitor 1                            | 99    | -0.0149 |
| HLA-DQ5 | KNEDYFKDLCPD                   | [Cys->Dha(C)@10; Cation:K(D)@13]        | S43A3_HUMAN | Solute carrier family 43 member 3                        | 96.53 | 0.012   |
| HLA-DQ5 | KNEDYFKDLCPD                   | [Glutathione(C)@10]                     | S43A3_HUMAN | Solute carrier family 43 member 3                        | 96.75 | 0.0001  |
| HLA-DQ5 | KNEDYFKDLCPDAG                 | [Trioxidation(C)@10]                    | S43A3_HUMAN | Solute carrier family 43 member 3                        | 96.48 | -0.0174 |

|                                           |                                                  |             |                                                       |       |         |
|-------------------------------------------|--------------------------------------------------|-------------|-------------------------------------------------------|-------|---------|
| HLA-DQ5 KNEDYFKDLCPD                      | [Trioxidation(C)@10]                             | S43A3_HUMAN | Solute carrier family 43 member 3                     | 97.36 | 0.0063  |
| HLA-DQ5 KNEDYFKDLCPDA                     | [Trioxidation(C)@10]                             | S43A3_HUMAN | Solute carrier family 43 member 3                     | 96.49 | -0.0163 |
| HLA-DQ5 NEDYFKDLCPDA                      | [Trioxidation(C)@9]                              | S43A3_HUMAN | Solute carrier family 43 member 3                     | 97.83 | -0.0151 |
| HLA-DQ5 TWVCDGYRDCADGSD                   | [Cys->Dha(C)@4; Dioxidation(C)@10]               | SORL_HUMAN  | Sortilin-related receptor                             | 97.68 | -0.016  |
| HLA-DQ5 SERCDGFLDCSDESDE                  | [Cys->Dha(C)@4; Dioxidation(C)@10]               | SORL_HUMAN  | Sortilin-related receptor                             | 93.92 | -0.0213 |
| HLA-DQ5 ERCDGFLDCSDESDEK                  | [Dioxidation(C)@3; Cys->Dha(C)@9]                | SORL_HUMAN  | Sortilin-related receptor                             | 98.86 | -0.021  |
| HLA-DQ5 SERCDGFLDCSDESDE                  | [Dioxidation(C)@4; Cys->Dha(C)@10]               | SORL_HUMAN  | Sortilin-related receptor                             | 93.92 | -0.0213 |
| HLA-DQ5 SERCDGFLDCSDESDEK                 | [Dioxidation(C)@4; Cys->Dha(C)@10]               | SORL_HUMAN  | Sortilin-related receptor                             | 97.93 | -0.0111 |
| HLA-DQ5 LSERCDGFLDCSDESDE                 | [Dioxidation(C)@5; Cys->Dha(C)@11]               | SORL_HUMAN  | Sortilin-related receptor                             | 95.84 | -0.0214 |
| HLA-DQ5 LSERCDGFLDCSDESDE                 | [Dioxidation(C)@5; Cys->Dha(C)@11]               | SORL_HUMAN  | Sortilin-related receptor                             | 95.87 | -0.017  |
| HLA-DQ5 LSERCDGFLDCSDESDEK                | [Dioxidation(C)@5; Cys->Dha(C)@11]               | SORL_HUMAN  | Sortilin-related receptor                             | 94.71 | 0.0091  |
| HLA-DQ5 LSERCDGFLDCSDESDEKA               | [Dioxidation(C)@5; Cys->Dha(C)@11]               | SORL_HUMAN  | Sortilin-related receptor                             | 94.83 | -0.0298 |
| HLA-DQ5 SERCDGFLDCSDESDEK                 | [Oxidation(C)@4; Oxidation(F)@7; Cys->Dha(C)@10] | SORL_HUMAN  | Sortilin-related receptor                             | 97.93 | -0.0111 |
| HLA-DQ5 HPKQCAFCENKLR                     | [Cys->Dha(C)@5; Dioxidation(C)@9]                | TR13B_HUMAN | Tumor necrosis factor receptor superfamily member 13B | 97.04 | -0.0159 |
| HLA-DQ5 SCPEEQYWDPLL                      | [Dioxidation(C)@2]                               | TR13B_HUMAN | Tumor necrosis factor receptor superfamily member 13B | 95    | -0.0172 |
| HLA-DQ5 SCPEEQYWDPLLGT                    | [Dioxidation(C)@2]                               | TR13B_HUMAN | Tumor necrosis factor receptor superfamily member 13B | 94.85 | -0.0059 |
| HLA-DQ5 HPKQCAFCENKLR                     | [Dioxidation(Y)@7; Cys->Dha(C)@9]                | TR13B_HUMAN | Tumor necrosis factor receptor superfamily member 13B | 97.04 | -0.0159 |
| HLA-DP4 TPTMGWLHWERFMCNLDCQ               | [Dioxidation(C)@14; Cys->Dha(C)@18]              | AGAL_HUMAN  | Alpha-galactosidase A                                 | 99    | -0.0295 |
| HLA-DP4 VDQFHGTEYVCCPQT                   | [Cys->Dha(C)@11; Dioxidation(C)@12]              | APLP2_HUMAN | Amyloid-like protein 2                                | 98.19 | -0.0148 |
| HLA-DP4 VDQFHGTEYVCCPQ                    | [Cys->Dha(C)@11; Dioxidation(C)@12]              | APLP2_HUMAN | Amyloid-like protein 2                                | 98.59 | -0.0132 |
| HLA-DP4 VDQFHGTEYVCCP                     | [Cys->Dha(C)@11; Dioxidation(C)@12]              | APLP2_HUMAN | Amyloid-like protein 2                                | 96.22 | -0.021  |
| HLA-DP4 RNNFESEDYCMVAVCKA                 | [Trioxidation(C)@14]                             | APLP2_HUMAN | Amyloid-like protein 2                                | 98.53 | -0.0279 |
| HLA-DP4 RNNFESEDYCMVAVC                   | [Cys->Dha(C)@10; Dioxidation(C)@14]              | APLP2_HUMAN | Amyloid-like protein 2                                | 96.43 | -0.0182 |
| HLA-DP4 NRNNFESEDYCMVAVCKA                | [Trioxidation(C)@15]                             | APLP2_HUMAN | Amyloid-like protein 2                                | 99    | -0.0333 |
| HLA-DP4 NRNNFESEDYCMVAVC                  | [Cys->Dha(C)@11; Dioxidation(C)@15]              | APLP2_HUMAN | Amyloid-like protein 2                                | 94.68 | -0.009  |
| HLA-DP4 GVDQFHGTEYVCCPQTK                 | [Cys->Dha(C)@12; Dioxidation(C)@13]              | APLP2_HUMAN | Amyloid-like protein 2                                | 99    | -0.0254 |
| HLA-DP4 GVDQFHGTEYVCCPQTK                 | [Dehydro(C)@13]                                  | APLP2_HUMAN | Amyloid-like protein 2                                | 98.9  | 0.0007  |
| HLA-DP4 GVDQFHGTEYVCCPQT                  | [Cys->Dha(C)@12; Dioxidation(C)@13]              | APLP2_HUMAN | Amyloid-like protein 2                                | 98.25 | -0.0111 |
| HLA-DP4 GVDQFHGTEYVCCPQ                   | [Cys->Dha(C)@12; Dioxidation(C)@13]              | APLP2_HUMAN | Amyloid-like protein 2                                | 98.23 | -0.0209 |
| HLA-DP4 GVDQFHGTEYVCCP                    | [Cys->Dha(C)@12; Dioxidation(C)@13]              | APLP2_HUMAN | Amyloid-like protein 2                                | 97.65 | -0.0204 |
| HLA-DP4 IPQNFADYFETSSQCS                  | [Dioxidation(C)@16]                              | CCL3_HUMAN  | C-C motif chemokine 3                                 | 95.85 | 0.0011  |
| HLA-DP4 IPQNFADYFETSSQCSKPS               | [Dioxidation(C)@16]                              | CL3L1_HUMAN | C-C motif chemokine 3-like 1                          | 95.38 | -0.0252 |
| HLA-DP4 LPRNFVVDYETSSLCS                  | [Dioxidation(C)@16]                              | CCL4_HUMAN  | C-C motif chemokine 4                                 | 99    | -0.0242 |
| HLA-DP4 KCWKFEHCNFNDVTTR                  | [Cys->Dha(C)@2; Dioxidation(C)@8]                | CD59_HUMAN  | CD59 glycoprotein                                     | 99    | -0.017  |
| HLA-DP4 CWKFEHCNFNDVTTR                   | [Cys->Dha(C)@1; Dioxidation(C)@7]                | CD59_HUMAN  | CD59 glycoprotein                                     | 97.52 | -0.0172 |
| HLA-DP4 CWKFEHCNFNDVTTR                   | [Cys->Dha(C)@1; Dioxidation(W)@2]                | CD59_HUMAN  | CD59 glycoprotein                                     | 97.52 | -0.0172 |
| HLA-DP4 CWKFEHCNFNDVTTR                   | [Dioxidation(C)@1; Cys->Dha(C)@7]                | CD59_HUMAN  | CD59 glycoprotein                                     | 97.52 | -0.0172 |
| HLA-DP4 HLCDFLETHFLDEEVK                  | [Delta:H(2)C(2)(H)@1; Glutathione(C)@3]          | FRIL_HUMAN  | Ferritin light chain                                  | 97.33 | -0.0034 |
| HLA-DP4 FEELCADLFRVPGPV                   | [Dioxidation(C)@5]                               | HYOU1_HUMAN | Hypoxia up-regulated protein 1                        | 97.21 | 0.0138  |
| HLA-DP4 TPSKQSNNKYAASSYLSLTPEQWKSHKSYSCQV | [Trioxidation(C)@31]                             | LAC3_HUMAN  | Ig lambda-3 chain C regions                           | 99    | -0.0474 |
| HLA-DP4 TFDQTAWGDSGVVYCS                  | [Dioxidation(C)@15]                              | LSR_HUMAN   | Lipolysis-stimulated lipoprotein receptor             | 99    | -0.0183 |
| HLA-DP4 RKLGAWVCDRLATC                    | [Dioxidation(C)@8; Cys->Dha(C)@14]               | FCER2_HUMAN | Low affinity immunoglobulin epsilon Fc receptor       | 99    | -0.0212 |
| HLA-DP4 KLGAWVCDRLATCTPP                  | [Dioxidation(C)@7; Cys->Dha(C)@13]               | FCER2_HUMAN | Low affinity immunoglobulin epsilon Fc receptor       | 95.58 | 0.0427  |
| HLA-DP4 DRKLGAWVCDRLATC                   | [Cys->Dha(C)@9; Dioxidation(C)@15]               | FCER2_HUMAN | Low affinity immunoglobulin epsilon Fc receptor       | 99    | -0.0135 |
| HLA-DP4 DRKLGAWVCDRLA                     | [Dioxidation(C)@9; Oxidation(R)@11]              | FCER2_HUMAN | Low affinity immunoglobulin epsilon Fc receptor       | 96.88 | -0.0336 |
| HLA-DP4 RDCRDWSDEPIKE                     | [Dioxidation(C)@3]                               | LDLR_HUMAN  | Low-density lipoprotein receptor                      | 96.8  | 0.0035  |
| HLA-DP4 RDCRDWSDEPIK                      | [Dioxidation(C)@3]                               | LDLR_HUMAN  | Low-density lipoprotein receptor                      | 97.18 | -0.0084 |
| HLA-DP4 ARDCRDWSDEPIKE                    | [Dioxidation(C)@4; Oxidation(R)@5]               | LDLR_HUMAN  | Low-density lipoprotein receptor                      | 94.56 | 0.0094  |
| HLA-DP4 ARDCRDWSDEPIKE                    | [Dioxidation(C)@4]                               | LDLR_HUMAN  | Low-density lipoprotein receptor                      | 94.56 | 0.0094  |
| HLA-DP4 ARDCRDWSDEPIKE                    | [Trioxidation(C)@4; Oxidation(W)@7]              | LDLR_HUMAN  | Low-density lipoprotein receptor                      | 94.56 | 0.0094  |
| HLA-DP4 ARDCRDWSDEPIKE                    | [Trioxidation(C)@4]                              | LDLR_HUMAN  | Low-density lipoprotein receptor                      | 94.56 | 0.0094  |

|         |                   |                                     |             |                                                            |       |         |
|---------|-------------------|-------------------------------------|-------------|------------------------------------------------------------|-------|---------|
| HLA-DP4 | ARDCRDWSDEPIK     | [Dioxidation(C)@4; Oxidation(R)@5]  | LDLR_HUMAN  | Low-density lipoprotein receptor                           | 95.02 | -0.0208 |
| HLA-DP4 | ARDCRDWSDEPIK     | [Dioxidation(C)@4]                  | LDLR_HUMAN  | Low-density lipoprotein receptor                           | 97.41 | -0.0029 |
| HLA-DP4 | ARDCRDWSDEPIK     | [Trioxidation(C)@4; Oxidation(W)@7] | LDLR_HUMAN  | Low-density lipoprotein receptor                           | 95.1  | -0.0029 |
| HLA-DP4 | ARDCRDWSDEPIK     | [Trioxidation(C)@4]                 | LDLR_HUMAN  | Low-density lipoprotein receptor                           | 97.41 | -0.0029 |
| HLA-DP4 | KSNLYCLKPTICSDDQN | [Cys->Dha(C)@6; Dioxidation(C)@12]  | LY6E_HUMAN  | Lymphocyte antigen 6E                                      | 99    | -0.0223 |
| HLA-DP4 | ARLSYAVGHFLNDLCAS | [Dioxidation(C)@15]                 | MFS12_HUMAN | Major facilitator superfamily domain-containing protein 1. | 94.56 | -0.0408 |
| HLA-DP4 | YTNAFAFTQFGVLCAP  | [Glutathione(C)@14]                 | S43A3_HUMAN | Solute carrier family 43 member 3                          | 94.63 | 0.0157  |
| HLA-DP4 | TNAFAFTQFGVLCAP   | [Trioxidation(C)@13]                | S43A3_HUMAN | Solute carrier family 43 member 3                          | 96.75 | -0.0006 |
| HLA-DP4 | NEDYFKDLCGPDA     | [Trioxidation(C)@9]                 | S43A3_HUMAN | Solute carrier family 43 member 3                          | 94.7  | -0.0251 |
| HLA-DP4 | KNEDYFKDLCGPDA    | [Trioxidation(C)@10]                | S43A3_HUMAN | Solute carrier family 43 member 3                          | 95.48 | -0.018  |
| HLA-DP4 | TWVCDGYRDCADGSD   | [Cys->Dha(C)@4; Dioxidation(C)@10]  | SORL_HUMAN  | Sortilin-related receptor                                  | 99    | -0.0122 |
| HLA-DP4 | SERCDGFLDCSDESDEK | [Dioxidation(C)@4; Cys->Dha(C)@10]  | SORL_HUMAN  | Sortilin-related receptor                                  | 96    | -0.0171 |
| HLA-DP4 | SERCDGFLDCSDESDE  | [Dioxidation(C)@4; Cys->Dha(C)@10]  | SORL_HUMAN  | Sortilin-related receptor                                  | 97.14 | -0.0131 |
| HLA-DP4 | SERCDGFLDCSDES    | [Dioxidation(C)@4; Cys->Dha(C)@10]  | SORL_HUMAN  | Sortilin-related receptor                                  | 95.12 | -0.016  |
| HLA-DP4 | ERCDGFLDCSDESDEK  | [Dioxidation(C)@3; Cys->Dha(C)@9]   | SORL_HUMAN  | Sortilin-related receptor                                  | 97.79 | -0.0189 |
| HLA-DP4 | HPKQCA YFCENKLR   | [Cys->Dha(C)@5; Dioxidation(C)@9]   | TR13B_HUMAN | Tumor necrosis factor receptor superfamily member 13B      | 99    | -0.0158 |
| HLA-A2  | LVLCLLSATV        | [Oxidation(C)@4]                    | SULF2_HUMAN | Extracellular sulfatase Sulf-2                             | 99    | 0.0031  |
| HLA-A2  | STCLVKIINEV       | [Cys->Dha(C)@3]                     | GMDS_HUMAN  | GDP-mannose 4,6 dehydratase                                | 98.05 | 0.0034  |
| HLA-A2  | STCLLPHIEAV       | [Cys->Dha(C)@3]                     | ORAI3_HUMAN | Protein orai-3                                             | 96.78 | 0.0042  |
| HLA-A2  | FLVDGVCTV         | [Glutathione(C)@7]                  | SPG20_HUMAN | Spartin                                                    | 95.28 | 0.0039  |
| HLA-A2  | YLFDRNGVCLH       | [Cys->Dha(C)@9; Oxidation(H)@11]    | TPPC1_HUMAN | Trafficking protein particle complex subunit 1             | 97.09 | -0.0095 |



| Allele       | Peptide                                | Modification                                                       | Accession   | Protein                                  | Confidence    |
|--------------|----------------------------------------|--------------------------------------------------------------------|-------------|------------------------------------------|---------------|
| HLA DR3/DR52 | AEREIVRDIKEKLCYV                       | Glutathione(C)@14                                                  | ACTC_HUMAN  | Actin, alpha cardiac muscle 1            | 96.38 0.0088  |
| HLA DR3/DR52 | AEREIVRDIKEKLCYVA                      | Glutathione(C)@14                                                  | ACTC_HUMAN  | Actin, alpha cardiac muscle 1            | 96.23 0.0088  |
| HLA DR3/DR52 | LVVDNGSGMGC                            | Glutathione(C)@10                                                  | ACTB_HUMAN  | Actin, cytoplasmic 1                     | 97.55 0.012   |
| HLA DR3/DR52 | IAALVVDNGSGMGC                         | Glutathione(C)@13                                                  | ACTB_HUMAN  | Actin, cytoplasmic 1                     | 99 -0.0018    |
| HLA DR3/DR52 | VVDNGSGMGC                             | Glutathione(C)@9                                                   | ACTB_HUMAN  | Actin, cytoplasmic 1                     | 99 -0.0026    |
| HLA DR3/DR52 | DDDI AALVVDNGSGMCKA                    | Protein Terminal Acetyl@N-term; Dioxidation(C)@16; Oxidation(K)@17 | ACTB_HUMAN  | Actin, cytoplasmic 1                     | 97.19 -0.0197 |
| HLA DR3/DR52 | DDDI AALVVDNGSGMCK                     | Protein Terminal Acetyl@N-term; Glutathione(C)@16                  | ACTB_HUMAN  | Actin, cytoplasmic 1                     | 96.12 0.0014  |
| HLA DR3/DR52 | DDDI AALVVDNGSGMGC                     | Protein Terminal Acetyl@N-term; Glutathione(C)@16                  | ACTB_HUMAN  | Actin, cytoplasmic 1                     | 99 -0.003     |
| HLA DR3/DR52 | DDDI AALVVDNGSGMCKA                    | Protein Terminal Acetyl@N-term; Trioxidation(C)@16                 | ACTB_HUMAN  | Actin, cytoplasmic 1                     | 99 -0.0132    |
| HLA DR3/DR52 | LVIDNGSGMGC                            | Glutathione(C)@10                                                  | ACTG_HUMAN  | Actin, cytoplasmic 2                     | 95.85 -0.0027 |
| HLA DR3/DR52 | IAALVIDNGSGMGC                         | Glutathione(C)@13                                                  | ACTG_HUMAN  | Actin, cytoplasmic 2                     | 98.87 -0.0006 |
| HLA DR3/DR52 | AEREIVRDIKEKLC                         | Glutathione(C)@14                                                  | ACTG_HUMAN  | Actin, cytoplasmic 2                     | 98.73 0.0016  |
| HLA DR3/DR52 | AEREIVRDIKEKLCY                        | Glutathione(C)@14                                                  | ACTG_HUMAN  | Actin, cytoplasmic 2                     | 99 0.0031     |
| HLA DR3/DR52 | VIDNGSGMGC                             | Glutathione(C)@9                                                   | ACTG_HUMAN  | Actin, cytoplasmic 2                     | 99 -0.0007    |
| HLA DR3/DR52 | EEEI AALVIDNGSGMCKA                    | Protein Terminal Acetyl@N-term; Dioxidation(C)@16; Oxidation(K)@17 | ACTG_HUMAN  | Actin, cytoplasmic 2                     | 97.57 -0.021  |
| HLA DR3/DR52 | EEEI AALVIDNGSGMCKAGFAGDDAPRAVFPVSVGRP | Protein Terminal Acetyl@N-term; Glutathione(C)@16                  | ACTG_HUMAN  | Actin, cytoplasmic 2                     | 99 -0.0017    |
| HLA DR3/DR52 | EEEI AALVIDNGSGMCKAGFAGDDAPR           | Protein Terminal Acetyl@N-term; Glutathione(C)@16                  | ACTG_HUMAN  | Actin, cytoplasmic 2                     | 97.2 0.0043   |
| HLA DR3/DR52 | EEEI AALVIDNGSGMGC                     | Protein Terminal Acetyl@N-term; Glutathione(C)@16                  | ACTG_HUMAN  | Actin, cytoplasmic 2                     | 97.55 0.0017  |
| HLA DR3/DR52 | EEEI AALVIDNGSGMCK                     | Protein Terminal Acetyl@N-term; Glutathione(C)@16                  | ACTG_HUMAN  | Actin, cytoplasmic 2                     | 98.1 0.0011   |
| HLA DR3/DR52 | EEEI AALVIDNGSGMCKA                    | Protein Terminal Acetyl@N-term; Trioxidation(C)@16                 | ACTG_HUMAN  | Actin, cytoplasmic 2                     | 99 0.0114     |
| HLA DR3/DR52 | AEREIVRDIKEKLCYVA                      | Trioxidation(C)@14                                                 | ACTG_HUMAN  | Actin, cytoplasmic 2                     | 98.16 -0.0146 |
| HLA DR3/DR52 | NLREVTKDQSGKYCCQV                      | Cys->Dha(C)@14; Dioxidation(C)@15                                  | CD22_HUMAN  | B-cell receptor CD22                     | 99 -0.0106    |
| HLA DR3/DR52 | NLREVTKDQSGKYCCQV                      | Dioxidation(C)@14; Cys->Dha(C)@15                                  | CD22_HUMAN  | B-cell receptor CD22                     | 99 -0.0115    |
| HLA DR3/DR52 | KQLNIAYDVTYSLACVRC                     | Oxidation(C)@18                                                    | CCR7_HUMAN  | C-C chemokine receptor type 7 Short      | 99 0.008      |
| HLA DR3/DR52 | GRAICSDPNKRVRKNA                       | Methyl(C)@5                                                        | CCL17_HUMAN | C-C motif chemokine 17                   | 99 -0.033     |
| HLA DR3/DR52 | RDKEICADPRVPVWKMI                      | Cys->Dha(C)@6; Dioxidation(R)@10                                   | CCL22_HUMAN | C-C motif chemokine 22                   | 98.56 -0.0113 |
| HLA DR3/DR52 | RDKEICADPRVPVWK                        | Cys->Dha(C)@6; Dioxidation(W)@13                                   | CCL22_HUMAN | C-C motif chemokine 22                   | 99 -0.0056    |
| HLA DR3/DR52 | RDKEICADPRVPVWKMI                      | Cys->Dha(C)@6; Dioxidation(W)@13                                   | CCL22_HUMAN | C-C motif chemokine 22                   | 98.3 -0.0113  |
| HLA DR3/DR52 | RDKEICADPRVPVWK                        | Trioxidation(C)@6; Oxidation(P)@12                                 | CCL22_HUMAN | C-C motif chemokine 22                   | 98.72 0.0044  |
| HLA DR3/DR52 | RDKEICADPRVPW                          | Trioxidation(C)@6; Oxidation(W)@13                                 | CCL22_HUMAN | C-C motif chemokine 22                   | 98.5 0.0044   |
| HLA DR3/DR52 | RDKEICADPRVPVWV                        | Trioxidation(C)@6; Oxidation(W)@13                                 | CCL22_HUMAN | C-C motif chemokine 22                   | 99 0.0056     |
| HLA DR3/DR52 | KPITPETAELKARDLKAVKYVECS               | Dioxidation(C)@23                                                  | CDC42_HUMAN | Cell division control protein 42 homolog | 99 -0.0137    |
| HLA DR3/DR52 | GGAEVAPVAQVALCLETVPVPAGQENPAMSPAVSQ    | Cys->Dha(C)@14                                                     | CNDD3_HUMAN | Condensin-2 complex subunit D3           | 99 0.0303     |
| HLA DR3/DR52 | CPIQKDKTYSYLNK                         | Dioxidation(C)@1                                                   | NPC2_HUMAN  | Epididymal secretory protein E1          | 99 0.0021     |
| HLA DR3/DR52 | CPIQKDKTYSYLNK                         | Glutathione(C)@1                                                   | NPC2_HUMAN  | Epididymal secretory protein E1          | 99 0.0016     |
| HLA DR3/DR52 | INCP IQKDKTYSYLNK                      | Glutathione(C)@3                                                   | NPC2_HUMAN  | Epididymal secretory protein E1          | 98.83 -0.0055 |
| HLA DR3/DR52 | CPIQKDKTYSYLNK                         | Trioxidation(C)@1                                                  | NPC2_HUMAN  | Epididymal secretory protein E1          | 99 0.0019     |
| HLA DR3/DR52 | CIITCDGKNLTIKTE                        | Cys->Dha(C)@1; Dioxidation(C)@5                                    | FABP5_HUMAN | Fatty acid-binding protein, epidermal    | 99 -0.0215    |
| HLA DR3/DR52 | CIITCDGKNLTIK                          | Cys->Dha(C)@1; Dioxidation(C)@5                                    | FABP5_HUMAN | Fatty acid-binding protein, epidermal    | 99 -0.0144    |
| HLA DR3/DR52 | KPDCIITCDGKNLTIKT                      | Cys->Dha(C)@4; Dioxidation(C)@8                                    | FABP5_HUMAN | Fatty acid-binding protein, epidermal    | 98.06 -0.0229 |
| HLA DR3/DR52 | KPDCIITCDGKNLTIKTE                     | Cys->Dha(C)@4; Dioxidation(C)@8                                    | FABP5_HUMAN | Fatty acid-binding protein, epidermal    | 99 -0.0495    |
| HLA DR3/DR52 | CIITCDGKNLTIKTE                        | Dioxidation(C)@1; Cys->Dha(C)@5                                    | FABP5_HUMAN | Fatty acid-binding protein, epidermal    | 98.93 -0.0215 |
| HLA DR3/DR52 | KPDCIITCDGKNLTIKTE                     | Dioxidation(C)@4; Cys->Dha(C)@8                                    | FABP5_HUMAN | Fatty acid-binding protein, epidermal    | 99 -0.0495    |
| HLA DR3/DR52 | AKPDCIITCDGKNLTIKT                     | Oxidation(P)@3; Dioxidation(C)@5                                   | FABP5_HUMAN | Fatty acid-binding protein, epidermal    | 99 -0.02      |
| HLA DR3/DR52 | AKPDCIITCDGKNLTIKT                     | Trioxidation(C)@5                                                  | FABP5_HUMAN | Fatty acid-binding protein, epidermal    | 99 -0.02      |
| HLA DR3/DR52 | AKPDCIITCDGKNLTIKTE                    | Trioxidation(C)@5                                                  | FABP5_HUMAN | Fatty acid-binding protein, epidermal    | 99 -0.0199    |
| HLA DR3/DR52 | DYRLDPQLQLHCS                          | Dioxidation(C)@12                                                  | GSLG1_HUMAN | Golgi apparatus protein 1                | 99 -0.018     |
| HLA DR3/DR52 | KADIFVDPVLHTAC                         | Glutathione(C)@14                                                  | GSLG1_HUMAN | Golgi apparatus protein 1                | 99 0.0114     |
| HLA DR3/DR52 | KADIFVDPVLHTACA                        | Glutathione(C)@14                                                  | GSLG1_HUMAN | Golgi apparatus protein 1                | 99 0.0062     |
| HLA DR3/DR52 | ISRDWKLDPVLYRKCCQG                     | Glutathione(C)@15                                                  | GSLG1_HUMAN | Golgi apparatus protein 1                | 99 -0.0036    |
| HLA DR3/DR52 | SKADIFVDPVLHTACA                       | Glutathione(C)@15                                                  | GSLG1_HUMAN | Golgi apparatus protein 1                | 98.94 0.0108  |
| HLA DR3/DR52 | IFVDPVLHTACA                           | Trioxidation(C)@11                                                 | GSLG1_HUMAN | Golgi apparatus protein 1                | 97.98 -0.0179 |
| HLA DR3/DR52 | KADIFVDPVLHTACA                        | Trioxidation(C)@14                                                 | GSLG1_HUMAN | Golgi apparatus protein 1                | 97.67 -0.0109 |
| HLA DR3/DR52 | EGQVISCLKLRVADQ                        | Trioxidation(C)@7                                                  | GSLG1_HUMAN | Golgi apparatus protein 1                | 99 0.0106     |

|              |                                |                                    |             |                                                                      |       |         |
|--------------|--------------------------------|------------------------------------|-------------|----------------------------------------------------------------------|-------|---------|
| HLA DR3/DR52 | EGQVISCLKLRADQR                | Trioxidation(C)@7                  | GSLG1_HUMAN | Golgi apparatus protein 1                                            | 99    | -0.0016 |
| HLA DR3/DR52 | LEGQVISCLKLRADQR               | Trioxidation(C)@8                  | GSLG1_HUMAN | Golgi apparatus protein 1                                            | 99    | -0.0006 |
| HLA DR3/DR52 | CPAGFTCDTQKGT                  | Cys->Dha(C)@1; Dioxidation(P)@2    | GRN_HUMAN   | Granulins                                                            | 99    | -0.0158 |
| HLA DR3/DR52 | CAQYFLDKIDVIK                  | Cys->Dha(C)@1; Deamidated(Q)@3     | GNAS2_HUMAN | Guanine nucleotide-binding protein G(s) subunit alpha isoforms short | 96.96 | 0.0325  |
| HLA DR3/DR52 | LPLPTPKVIGIDLGTTCYS            | Dioxidation(C)@18                  | HSP13_HUMAN | Heat shock 70 kDa protein 13                                         | 99    | -0.0183 |
| HLA DR3/DR52 | LPTPKVIGIDLGTTCYS              | Glutathione(C)@16                  | HSP13_HUMAN | Heat shock 70 kDa protein 13                                         | 95.68 | 0.0093  |
| HLA DR3/DR52 | LPLPTPKVIGIDLGTTCY             | Glutathione(C)@18                  | HSP13_HUMAN | Heat shock 70 kDa protein 13                                         | 98.41 | 0.0304  |
| HLA DR3/DR52 | LPLPTPKVIGIDLGTTCYSGVGFPPGTGKV | Glutathione(C)@18                  | HSP13_HUMAN | Heat shock 70 kDa protein 13                                         | 97.76 | -0.004  |
| HLA DR3/DR52 | LPLPTPKVIGIDLGTTCYSGV          | Glutathione(C)@18                  | HSP13_HUMAN | Heat shock 70 kDa protein 13                                         | 98.84 | -0.0005 |
| HLA DR3/DR52 | YGCDVGPDRLLRGHN                | Glutathione(C)@3                   | 1B42_HUMAN  | HLA class I histocompatibility antigen, B-42 alpha chain             | 96.39 | 0.0017  |
| HLA DR3/DR52 | YGCDVGPDRLLRGHN                | Trioxidation(C)@3                  | 1B42_HUMAN  | HLA class I histocompatibility antigen, B-42 alpha chain             | 98.92 | 0.0062  |
| HLA DR3/DR52 | YGCDVGPDRLLRGHN                | Dioxidation(C)@3                   | 1B08_HUMAN  | HLA class I histocompatibility antigen, B-8 alpha chain              | 97.47 | 0.0003  |
| HLA DR3/DR52 | GCDVGPDRLLRGHN                 | Glutathione(C)@2                   | 1B08_HUMAN  | HLA class I histocompatibility antigen, B-8 alpha chain              | 99    | 0.0023  |
| HLA DR3/DR52 | YGCDVGPDRLLRGHNQ               | Glutathione(C)@3                   | 1B08_HUMAN  | HLA class I histocompatibility antigen, B-8 alpha chain              | 98.93 | 0.0022  |
| HLA DR3/DR52 | CGCDLGPDRLLRGYD                | Oxidation(C)@1                     | 1C01_HUMAN  | HLA class I histocompatibility antigen, Cw-1 alpha chain             | 99    | 0       |
| HLA DR3/DR52 | SGCDLGPDRLLRGYDQ               | Dioxidation(C)@3                   | 1C07_HUMAN  | HLA class I histocompatibility antigen, Cw-7 alpha chain             | 99    | -0.0175 |
| HLA DR3/DR52 | SGCDLGPDRLLRGYDQS              | Dioxidation(C)@3                   | 1C07_HUMAN  | HLA class I histocompatibility antigen, Cw-7 alpha chain             | 98.33 | -0.0175 |
| HLA DR3/DR52 | SGCDLGPDRLLRGYD                | Dioxidation(C)@3                   | 1C07_HUMAN  | HLA class I histocompatibility antigen, Cw-7 alpha chain             | 98.29 | -0.0172 |
| HLA DR3/DR52 | MSGCDLGPDRLLRGYD               | Dioxidation(M)@1; Dioxidation(C)@4 | 1C07_HUMAN  | HLA class I histocompatibility antigen, Cw-7 alpha chain             | 99    | 0.0205  |
| HLA DR3/DR52 | CGGEDIVADHVASYGVN              | Cys->Dha(C)@1                      | DQA1_HUMAN  | HLA class II histocompatibility antigen, DQ alpha 1 chain            | 99    | -0.0228 |
| HLA DR3/DR52 | DPTDGSILACDPGLSRTCDQ           | Glutathione(C)@18                  | ITAL_HUMAN  | Integrin alpha-L                                                     | 99    | -0.0014 |
| HLA DR3/DR52 | SPRVLEVDTQGTVVCS               | Dioxidation(C)@15                  | ICAM1_HUMAN | Intercellular adhesion molecule 1 Short                              | 97.62 | -0.0072 |
| HLA DR3/DR52 | EVDTQGTVVC                     | Glutathione(C)@10                  | ICAM1_HUMAN | Intercellular adhesion molecule 1 Short                              | 96.08 | 0.0063  |
| HLA DR3/DR52 | FPRWYDPTQICKS                  | Dioxidation(C)@13                  | SPIT1_HUMAN | Kunitz-type protease inhibitor 1                                     | 98.82 | -0.014  |
| HLA DR3/DR52 | FPRWYDPTQIC                    | Glutathione(C)@13                  | SPIT1_HUMAN | Kunitz-type protease inhibitor 1                                     | 98.87 | 0.0062  |
| HLA DR3/DR52 | FPRWYDPTQICK                   | Glutathione(C)@13                  | SPIT1_HUMAN | Kunitz-type protease inhibitor 1                                     | 97.35 | 0.0027  |
| HLA DR3/DR52 | FPRWYDPTQICKS                  | Glutathione(C)@13                  | SPIT1_HUMAN | Kunitz-type protease inhibitor 1                                     | 99    | 0.0032  |
| HLA DR3/DR52 | GVICKDQRLPGFSD                 | Glutathione(C)@4                   | LOXL3_HUMAN | Lysyl oxidase homolog 3 EC                                           | 99    | -0.0051 |
| HLA DR3/DR52 | CIHGICMDGINRYS                 | Oxidation(C)@1                     | NOTC2_HUMAN | Neurogenic locus notch homolog protein 2 Short                       | 99    | 0.0356  |
| HLA DR3/DR52 | VCQALAKDPKLLQGGYN              | Dioxidation(C)@2                   | PPT1_HUMAN  | Palmitoyl-protein thioesterase 1 Short                               | 96.01 | 0.0003  |
| HLA DR3/DR52 | VCQALAKDPKLLQGG                | Dioxidation(C)@2                   | PPT1_HUMAN  | Palmitoyl-protein thioesterase 1 Short                               | 96.58 | 0.0041  |
| HLA DR3/DR52 | VCQALAKDPKLLQGGYN              | Glutathione(C)@2                   | PPT1_HUMAN  | Palmitoyl-protein thioesterase 1 Short                               | 98.6  | -0.0054 |
| HLA DR3/DR52 | VCQALAKDPKLLQ                  | Trioxidation(C)@2                  | PPT1_HUMAN  | Palmitoyl-protein thioesterase 1 Short                               | 99    | 0.0042  |
| HLA DR3/DR52 | VCQALAKDPKLLQGGYN              | Trioxidation(C)@2                  | PPT1_HUMAN  | Palmitoyl-protein thioesterase 1 Short                               | 99    | -0.006  |
| HLA DR3/DR52 | VCQALAKDPKLLQGG                | Trioxidation(C)@2                  | PPT1_HUMAN  | Palmitoyl-protein thioesterase 1 Short                               | 96.78 | -0.0015 |
| HLA DR3/DR52 | LPCDICKDVVTAAGDM               | Dioxidation(C)@3; Cys->Dha(C)@6    | SAP_HUMAN   | Proactivator polypeptide Contains                                    | 99    | -0.0042 |
| HLA DR3/DR52 | FREHLVRDSVFQRCGLR              | Glutathione(C)@14                  | PRRT3_HUMAN | Proline-rich transmembrane protein 3 Flags                           | 97.27 | 0.0065  |
| HLA DR3/DR52 | VPGFADDPTELACR                 | Glutathione(C)@13                  | FPRP_HUMAN  | Prostaglandin F2 receptor negative regulator                         | 99    | -0.0009 |
| HLA DR3/DR52 | NILWLDYKNICKVVE                | Dioxidation(C)@11                  | KPYM_HUMAN  | Pyruvate kinase isozymes M1/M2 EC                                    | 99    | 0.0282  |
| HLA DR3/DR52 | NILWLDYKNICKVVEV               | Dioxidation(C)@11                  | KPYM_HUMAN  | Pyruvate kinase isozymes M1/M2 EC                                    | 96.44 | 0.0054  |
| HLA DR3/DR52 | DENILWLDYKNICKVVE              | Dioxidation(C)@13                  | KPYM_HUMAN  | Pyruvate kinase isozymes M1/M2 EC                                    | 98.69 | -0.0046 |
| HLA DR3/DR52 | NILWLDYKNICKVVE                | Oxidation(W)@4; Dioxidation(C)@11  | KPYM_HUMAN  | Pyruvate kinase isozymes M1/M2 EC                                    | 99    | -0.0007 |
| HLA DR3/DR52 | NILWLDYKNICKVVE                | Oxidation(W)@4; Trioxidation(C)@11 | KPYM_HUMAN  | Pyruvate kinase isozymes M1/M2 EC                                    | 99    | 0.0046  |
| HLA DR3/DR52 | ENILWLDYKNICKVVE               | Oxidation(W)@5; Dioxidation(C)@12  | KPYM_HUMAN  | Pyruvate kinase isozymes M1/M2 EC                                    | 99    | -0.0009 |
| HLA DR3/DR52 | DENILWLDYKNICKVVE              | Oxidation(W)@6; Dioxidation(C)@13  | KPYM_HUMAN  | Pyruvate kinase isozymes M1/M2 EC                                    | 99    | -0.001  |
| HLA DR3/DR52 | NILWLDYKNICKVVE                | Trioxidation(C)@11                 | KPYM_HUMAN  | Pyruvate kinase isozymes M1/M2 EC                                    | 99    | -0.0007 |
| HLA DR3/DR52 | KNICKVVEV                      | Trioxidation(C)@4                  | KPYM_HUMAN  | Pyruvate kinase isozymes M1/M2 EC                                    | 99    | -0.0023 |
| HLA DR3/DR52 | GCFIVIDAMLERIKPE               | Glutathione(C)@2                   | PTPRS_HUMAN | Receptor-type tyrosine-protein phosphatase S Short                   | 99    | 0.0056  |
| HLA DR3/DR52 | GGPGCERLLSRVAALFPALRPG         | Glutathione(C)@5                   | SQSTM_HUMAN | Sequestosome-1                                                       | 99    | -0.0013 |
| HLA DR3/DR52 | AGPGPCERLLSRVAALFPALRPG        | Oxidation(P)@3; Dioxidation(C)@6   | SQSTM_HUMAN | Sequestosome-1                                                       | 99    | -0.0161 |
| HLA DR3/DR52 | AGPGPCERLLSRVAALFPALRPG        | Trioxidation(C)@6                  | SQSTM_HUMAN | Sequestosome-1                                                       | 99    | -0.0161 |
| HLA DR3/DR52 | FHSMVCDGIIQCRDGSDE             | Cys->Dha(C)@6; Dioxidation(C)@12   | SORL_HUMAN  | Sortilin-related receptor                                            | 96.58 | -0.0132 |
| HLA DR3/DR52 | FHSMVCDGIIQCRDGS               | Cys->Dha(C)@6; Dioxidation(C)@12   | SORL_HUMAN  | Sortilin-related receptor                                            | 97.93 | -0.0162 |
| HLA DR3/DR52 | FHSMVCDGIIQCRDGS               | Dioxidation(C)@6; Cys->Dha(C)@12   | SORL_HUMAN  | Sortilin-related receptor                                            | 96.03 | -0.0158 |
| HLA DR3/DR52 | CPPTVCQDPKPEPRA                | Cys->Dha(C)@1; Dioxidation(P)@3    | TRAF1_HUMAN | TNF receptor-associated factor 1                                     | 99    | -0.0185 |
| HLA DR3/DR52 | LDHLVEIDFRNCVPIPL              | Cys->Dha(C)@11; Dioxidation(C)@13  | TLR7_HUMAN  | Toll-like receptor 7 Flags                                           | 97.61 | -0.0105 |
| HLA DR3/DR52 | CPSDWKTSTCRMVTS                | Cys->Dha(C)@1; Dioxidation(P)@2    | TFR1_HUMAN  | Transferrin receptor protein 1 Short                                 | 99    | -0.0171 |

|                   |                            |                                                     |             |                                                                         |       |         |
|-------------------|----------------------------|-----------------------------------------------------|-------------|-------------------------------------------------------------------------|-------|---------|
| HLA DR3/DR52      | CPSDWKTDSTCRMVTS           | Cys->Dha(C)@1; Dioxidation(W)@5                     | TFR1_HUMAN  | Transferrin receptor protein 1 Short                                    | 99    | -0.018  |
| HLA DR3/DR52      | CPSDWKTDSTCRMVTS           | Glutathione(C)@1                                    | TFR1_HUMAN  | Transferrin receptor protein 1 Short                                    | 98.29 | -0.0004 |
| HLA DR3/DR52      | CPSDWKTDSTCRMVMT           | Oxidation(C)@1; Dehydrated(S)@3                     | TFR1_HUMAN  | Transferrin receptor protein 1 Short                                    | 99    | -0.0033 |
| HLA DR3/DR52      | MVDNEAIYDIC                | Glutathione(C)@11                                   | TBA1C_HUMAN | Tubulin alpha-1C chain                                                  | 98.8  | -0.0002 |
| HLA DR3/DR52      | CEPDYLDDEAGRCT             | Glutathione(C)@1                                    | TNR8_HUMAN  | Tumor necrosis factor receptor superfamily member 8                     | 98.65 | -0.0008 |
| HLA DR3/DR52      | FNVFVCDQKCNIAIDIK          | Cys->Dha(C)@6; Dioxidation(C)@10                    | VP13C_HUMAN | Vacuolar protein sorting-associated protein 13C - Homo sapiens (Human). | 97.51 | 0.0038  |
| HLA-DQ2           | CKAGFAGDDAPRAVFP           | Trioxidation(C)@1                                   | ACTB_HUMAN  | Actin, cytoplasmic 1                                                    | 98.44 | -0.003  |
| HLA-DQ2           | RAYLEGRCEVWLR              | Dioxidation(R)@7; Dioxidation(C)@8                  | 1A11_HUMAN  | HLA class I histocompatibility antigen, A-11 alpha chain                | 99    | -0.0332 |
| HLA-DQ2           | SPEPEAEAEAAAGPGPC          | Glutathione(C)@17                                   | SQSTM_HUMAN | Sequestosome-1                                                          | 99    | 0.0046  |
| HLA-DQ2           | GPGPCERLLSRVAALFPALRPG     | Glutathione(C)@5                                    | SQSTM_HUMAN | Sequestosome-1                                                          | 99    | 0.0116  |
| HLA-DQ2           | AGPGPCERLLSRVAALFPALRPG    | Oxidation(P)@3; Dioxidation(C)@6                    | SQSTM_HUMAN | Sequestosome-1                                                          | 99    | -0.0214 |
| HLA-DP3           | SSGRCWIFSLNVMRLP           | Cys->Dha(C)@5; Dioxidation(C)@10                    | BLMH_HUMAN  | Bleomycin hydrolase                                                     | 99    | -0.0157 |
| HLA-DP3           | IPCEKVSTLPAITLK            | Glutathione(C)@3                                    | CATD_HUMAN  | Cathepsin D                                                             | 99    | 0.0017  |
| HLA-DP3           | DSVCCRDYVRYRLPL            | Cys->Dha(C)@4; Dioxidation(C)@5                     | CCL22_HUMAN | C-C motif chemokine 22                                                  | 97.72 | -0.0055 |
| HLA-DP3           | DSVCCRDYVRYRLPL            | Dioxidation(C)@4; Cys->Dha(C)@5                     | CCL22_HUMAN | C-C motif chemokine 22                                                  | 99    | -0.0058 |
| HLA-DP3           | SKNRVPDSCCINVT             | Cys->Dha(C)@9; Dioxidation(C)@10                    | CD63_HUMAN  | CD63 antigen                                                            | 96.76 | -0.0155 |
| HLA-DP3           | ERDCREAEKAAQTAER           | Glutathione(C)@4                                    | CIP4_HUMAN  | Cdc42-interacting protein 4                                             | 99    | 0.0012  |
| HLA-DP3           | ACSHSMRYFDTAVSRPG          | Trioxidation(C)@2                                   | 1C07_HUMAN  | HLA class I histocompatibility antigen, Cw-7 alpha chain                | 97.36 | 0.0211  |
| HLA-DP3           | SPYYSRQYSVAFCNHVR          | Glutathione(C)@13                                   | NIBAN_HUMAN | Protein Niban                                                           | 99    | 0.0063  |
| HLA-DP3           | SPYYSRQYSVAFCNHVRT         | Oxidation(C)@13; Deamidated(N)@14; Deamidated(R)@17 | NIBAN_HUMAN | Protein Niban                                                           | 97.39 | -0.0009 |
| HLA-DP3           | QDPRTCEEPASSGAH            | Trioxidation(C)@6                                   | RHDF2_HUMAN | Rhomboid family member 2                                                | 98.34 | 0.0071  |
| HLA-DP3           | GPVVGTRYKSCVCPDYD          | Cys->Dha(C)@10; Dioxidation(C)@13                   | SQSTM_HUMAN | Sequestosome-1                                                          | 97.79 | -0.0091 |
| HLA-DP3           | GPGPCERLLSRVAALFPALRPG     | Dioxidation(C)@5                                    | SQSTM_HUMAN | Sequestosome-1                                                          | 98.83 | 0.0169  |
| HLA-DP3           | AGPGPCERLLSRVAALFPALRP     | Dioxidation(C)@6; Oxidation(R)@12                   | SQSTM_HUMAN | Sequestosome-1                                                          | 99    | -0.0014 |
| HLA-DP3           | AGPGPCERLLSRVAALFPALRPGGFQ | Dioxidation(C)@6; Oxidation(R)@12                   | SQSTM_HUMAN | Sequestosome-1                                                          | 99    | 0.0066  |
| HLA-DP3           | AGPGPCERLLSRVAALFPALRPGG   | Dioxidation(C)@6; Oxidation(R)@12                   | SQSTM_HUMAN | Sequestosome-1                                                          | 99    | -0.0068 |
| HLA-DP3           | GPGPCERLLSRVAALFPALR       | Glutathione(C)@5                                    | SQSTM_HUMAN | Sequestosome-1                                                          | 97.35 | 0.0077  |
| HLA-DP3           | GPGPCERLLSRVAALFPALRPG     | Glutathione(C)@5                                    | SQSTM_HUMAN | Sequestosome-1                                                          | 99    | 0.0106  |
| HLA-DP3           | GPGPCERLLSRVAALFPALRPGGFQ  | Glutathione(C)@5                                    | SQSTM_HUMAN | Sequestosome-1                                                          | 99    | 0.0136  |
| HLA-DP3           | AGPGPCERLLSRVAALFPALRP     | Oxidation(P)@3; Dioxidation(C)@6                    | SQSTM_HUMAN | Sequestosome-1                                                          | 99    | -0.0078 |
| HLA-DP3           | AGPGPCERLLSRVAALFPALRPG    | Oxidation(P)@3; Dioxidation(C)@6                    | SQSTM_HUMAN | Sequestosome-1                                                          | 99    | -0.0073 |
| HLA-DP3           | AGPGPCERLLSRVAALFPALRPG    | Oxidation(P)@5; Dioxidation(C)@6                    | SQSTM_HUMAN | Sequestosome-1                                                          | 98.35 | -0.0102 |
| HLA-DP3           | GPGPCERLLSRVAALFPA         | Trioxidation(C)@5                                   | SQSTM_HUMAN | Sequestosome-1                                                          | 99    | 0.0123  |
| HLA-DP3           | GPGPCERLLSRVAALFPALRPG     | Trioxidation(C)@5                                   | SQSTM_HUMAN | Sequestosome-1                                                          | 99    | 0.0113  |
| HLA-DP3           | AGPGPCERLLSRVAALFPA        | Trioxidation(C)@6                                   | SQSTM_HUMAN | Sequestosome-1                                                          | 98.17 | -0.003  |
| HLA-DP3           | AGPGPCERLLSRVAALFPALRP     | Trioxidation(C)@6                                   | SQSTM_HUMAN | Sequestosome-1                                                          | 99    | -0.0076 |
| HLA-DP3           | AGPGPCERLLSRVAALFPALRPG    | Trioxidation(C)@6                                   | SQSTM_HUMAN | Sequestosome-1                                                          | 98.51 | -0.0085 |
| HLA-DP3           | AGPGPCERLLSRVAALFPALRPGGFQ | Trioxidation(C)@6                                   | SQSTM_HUMAN | Sequestosome-1                                                          | 99    | -0.0053 |
| HLA-A1/B8/Bw6/Cw7 | ASEVCPPPGY                 | Glutathione(C)@5                                    | PIAS3_HUMAN | E3 SUMO-protein ligase PIAS3                                            | 98.22 | -0.0043 |
| HLA-A1/B8/Bw6/Cw7 | HTDCPGHADY                 | Glutathione(C)@4                                    | EFTU_HUMAN  | Elongation factor Tu, mitochondrial                                     | 99    | -0.0004 |
| HLA-A1/B8/Bw6/Cw7 | LADLSCLVY                  | Glutathione(C)@6                                    | ERH_HUMAN   | Enhancer of rudimentary homolog                                         | 95.79 | 0.003   |
| HLA-A1/B8/Bw6/Cw7 | ASINLNAINKCPLLPKWPAL       | Dehydro(C)@11                                       | ALDOA_HUMAN | Fructose-bisphosphate aldolase A                                        | 99    | 0.0038  |
| HLA-A1/B8/Bw6/Cw7 | NKCPLLPKWPAL               | Dioxidation(C)@3                                    | ALDOA_HUMAN | Fructose-bisphosphate aldolase A                                        | 97.22 | 0.0145  |
| HLA-A1/B8/Bw6/Cw7 | GCPLPEACELY                | Glutathione(C)@2                                    | NAT10_HUMAN | N-acetyltransferase 10                                                  | 97.67 | 0.048   |
| HLA-A1/B8/Bw6/Cw7 | QTDCAPNNGY                 | Glutathione(C)@4                                    | NOMO3_HUMAN | Nodal modulator 3                                                       | 99    | -0.0008 |
| HLA-A1/B8/Bw6/Cw7 | VTDDLVLCLVY                | Glutathione(C)@7                                    | SRP09_HUMAN | Signal recognition particle 9 kDa protein                               | 98.74 | 0.0071  |
| HLA-A1/B8/Bw6/Cw7 | KSDIWSIGCTVFE              | Dioxidation(C)@9                                    | YSK4_HUMAN  | SPS1/STE20-related protein kinase YSK4                                  | 98.89 | 0.0229  |



## CELL LINE-BOLETH (DR4-DQ8)

| Allele       | Peptide                 | Modification                       | Accession   | Protein                                                   | Confidence |         |
|--------------|-------------------------|------------------------------------|-------------|-----------------------------------------------------------|------------|---------|
| HLA-DR4/DR53 | IDESLGTGETTPCSKVTA      | Trioxidation(C)@13                 | AT2C1_HUMAN | Calcium-transporting ATPase type 2C member 1              | 98.95      | -0.024  |
| HLA-DR4/DR53 | CGSCWAHASTSAMADR        | Oxidation(C)@4                     | CATZ_HUMAN  | Cathepsin Z                                               | 99         | -0.0095 |
| HLA-DR4/DR53 | CGSCWAHASTSAMADR        | Oxidation(C)@1                     | CATZ_HUMAN  | Cathepsin Z                                               | 99         | -0.0095 |
| HLA-DR4/DR53 | SRCYTCQVNSVSS           | Cys->Dha(C)@3; Dioxidation(C)@6    | CD48_HUMAN  | CD48 antigen                                              | 96.16      | -0.0308 |
| HLA-DR4/DR53 | GYVDDTQFVRFSDSACPRMEPR  | Dehydro(C)@17                      | HLAG_HUMAN  | HLA class I histocompatibility antigen, alpha chain G     | 99         | 0.0297  |
| HLA-DR4/DR53 | VDDTQFVRFSDSACPRMEPR    | Dehydro(C)@15; Oxidation(M)@18     | HLAG_HUMAN  | HLA class I histocompatibility antigen, alpha chain G     | 99         | 0.03    |
| HLA-DR4/DR53 | VDDTQFVRFSDSACPRMEPRAP  | Dehydro(C)@15; Oxidation(M)@18     | HLAG_HUMAN  | HLA class I histocompatibility antigen, alpha chain G     | 98.24      | 0.0258  |
| HLA-DR4/DR53 | VDDTQFVRFSDSACPRMEPR    | Dehydro(C)@15                      | HLAG_HUMAN  | HLA class I histocompatibility antigen, alpha chain G     | 99         | 0.0359  |
| HLA-DR4/DR53 | VDDTQFVRFSDSACPRMEPRAP  | Dehydro(C)@15                      | HLAG_HUMAN  | HLA class I histocompatibility antigen, alpha chain G     | 97.25      | 0.0359  |
| HLA-DR4/DR53 | VDDTQFVRFSDSACPRMEPRAPW | Dehydro(C)@15                      | HLAG_HUMAN  | HLA class I histocompatibility antigen, alpha chain G     | 99         | 0.031   |
| HLA-DR4/DR53 | DDTQFVRFSDSACPRMEPR     | Dehydro(C)@14                      | HLAG_HUMAN  | HLA class I histocompatibility antigen, alpha chain G     | 99         | 0.0333  |
| HLA-DR4/DR53 | LRSTAADTAAQIT           | Methyl(C)@4                        | 1C16_HUMAN  | HLA class I histocompatibility antigen, Cw-16 alpha chain | 99         | -0.017  |
| HLA-DR4/DR53 | LRSTAADTAAQITQ          | Methyl(C)@4                        | 1C16_HUMAN  | HLA class I histocompatibility antigen, Cw-16 alpha chain | 98.05      | -0.018  |
| HLA-DR4/DR53 | RSCTAADTAAQITQ          | Methyl(C)@3                        | 1C16_HUMAN  | HLA class I histocompatibility antigen, Cw-16 alpha chain | 99         | -0.0161 |
| HLA-DR4/DR53 | RSCTAADTAAQITQR         | GlnThrGlyGly(C)@3                  | 1C16_HUMAN  | HLA class I histocompatibility antigen, Cw-16 alpha chain | 99         | 0.013   |
| HLA-DR4/DR53 | VTWLCNGELVTEGVAESFLP    | Dioxidation(W)@3; Dioxidation(C)@5 | DPA1_HUMAN  | HLA class II histocompatibility antigen, DP alpha 1 chain | 97.12      | -0.0159 |
| HLA-DR4/DR53 | CNGELVTEGVAESFLPR       | Cys->Dha(C)@1; Deamidated(N)@2     | DPA1_HUMAN  | HLA class II histocompatibility antigen, DP alpha 1 chain | 99         | -0.0086 |
| HLA-DR4/DR53 | FPRWYDPTEQICKS          | Dioxidation(C)@13                  | SPIT1_HUMAN | Kunitz-type protease inhibitor 1                          | 99         | -0.0261 |
| HLA-DR4/DR53 | CLKPTICSDQDNYCVT        | Oxidation(C)@7                     | LY6E_HUMAN  | Lymphocyte antigen 6E                                     | 98         | -0.0051 |
| HLA-DR4/DR53 | WGPSYWCQNTETAAQCNA      | Trioxidation(C)@16                 | SAP_HUMAN   | Proactivator polypeptide                                  | 96.09      | -0.0246 |
| HLA-DR4/DR53 | GPSYWCQNTETAAQCNA       | Trioxidation(C)@15                 | SAP_HUMAN   | Proactivator polypeptide                                  | 98.7       | -0.0261 |
| HLA-DR4/DR53 | CCVLVFDVTPANTFK         | Cys->Dha(C)@1; Dioxidation(C)@2    | RAB7A_HUMAN | Ras-related protein Rab-7a                                | 99         | -0.0228 |
| HLA-DR4/DR53 | IPQRWACDGDTCQDQD        | Oxidation(C)@7; Dehydrated(T)@11   | SORL_HUMAN  | Sortilin-related receptor                                 | 99         | -0.0051 |
| HLA-DR4/DR53 | IPQRWACDGDTCQDQGS       | Dioxidation(C)@7; Cys->Dha(C)@13   | SORL_HUMAN  | Sortilin-related receptor                                 | 98.7       | -0.0238 |
| HLA-DR4/DR53 | IPQRWACDGDTCQDQDGS      | Cys->Dha(C)@7; Dioxidation(C)@13   | SORL_HUMAN  | Sortilin-related receptor                                 | 98.48      | -0.0245 |
| HLA-DR4/DR53 | IPQRWACDGDTCQDQD        | Cys->Dha(C)@7; Dioxidation(C)@13   | SORL_HUMAN  | Sortilin-related receptor                                 | 96.3       | -0.0229 |
| HLA-DR4/DR53 | IPQRWACDGDTCQDQGS       | Cys->Dha(C)@7; Dioxidation(C)@13   | SORL_HUMAN  | Sortilin-related receptor                                 | 96.09      | -0.0238 |
| HLA-DR4/DR53 | IRSSWVCDGDNDICRDWS      | Cys->Dha(C)@7; Dioxidation(C)@13   | SORL_HUMAN  | Sortilin-related receptor                                 | 96.36      | -0.0253 |
| HLA-DR4/DR53 | CPSDWKTDSTCRMVT         | Oxidation(C)@1; Dehydrated(T)@7    | TFR1_HUMAN  | Transferrin receptor protein 1                            | 96.98      | -0.0096 |
| HLA-DR4/DR53 | CPSDWKTDSTCRMVTS        | Oxidation(C)@1; Dehydrated(T)@7    | TFR1_HUMAN  | Transferrin receptor protein 1                            | 99         | -0.0068 |
| HLA-DR4/DR53 | CPSDWKTDSTCRMVT         | Oxidation(C)@1; Dehydrated(T)@10   | TFR1_HUMAN  | Transferrin receptor protein 1                            | 97.34      | -0.0072 |
| HLA-DR4/DR53 | CPSDWKTDSTCRMVT         | Oxidation(C)@1; Dehydrated(S)@3    | TFR1_HUMAN  | Transferrin receptor protein 1                            | 95.94      | -0.0072 |
| HLA-DR4/DR53 | CPSDWKTDSTCRMVT         | Oxidation(C)@1; Dehydrated(D)@4    | TFR1_HUMAN  | Transferrin receptor protein 1                            | 99         | -0.0096 |
| HLA-DR4/DR53 | CPSDWKTDSTCRMVTS        | Cys->Dha(C)@1; Dioxidation(W)@5    | TFR1_HUMAN  | Transferrin receptor protein 1                            | 96.3       | -0.0246 |
| HLA-DR4/DR53 | CPSDWKTDSTCRMVT         | Cys->Dha(C)@1; Dioxidation(P)@2    | TFR1_HUMAN  | Transferrin receptor protein 1                            | 97.79      | -0.0277 |
| HLA-DQ8      | EEETALVCDNGSG           | Dioxidation(C)@9                   | ACTH_HUMAN  | Actin, gamma-enteric smooth muscle                        | 99         | -0.0249 |
| HLA-DQ8      | DKFNQCGTCNEFKE          | Cys->Dha(C)@6; Dioxidation(C)@9    | CATZ_HUMAN  | Cathepsin Z                                               | 99         | -0.0271 |
| HLA-DQ8      | SCPREEEGSTIPIQEDYRKP    | Dioxidation(C)@2                   | CD27_HUMAN  | CD27 antigen                                              | 99         | -0.0258 |
| HLA-DQ8      | YPCSEVKGEEDN            | Cys->Dha(C)@3; Dioxidation(C)@5    | CD82_HUMAN  | CD82 antigen                                              | 99         | -0.0212 |
| HLA-DQ8      | AEEAGASAAACEAPSA        | Trioxidation(C)@11                 | MARCS_HUMAN | Myristoylated alanine-rich C-kinase substrate             | 99         | -0.0194 |

|         |                    |                                       |             |                                   |       |         |
|---------|--------------------|---------------------------------------|-------------|-----------------------------------|-------|---------|
| HLA-DP4 | DPHLCDFLETHFLDEEVK | Trioxidation(C)@5                     | FRIL_HUMAN  | Ferritin light chain              | 96.7  | -0.0196 |
| HLA-DP4 | HLCDFLETHFLDEEVK   | Delta:H(2)C(2)(H)@1; Glutathione(C)@3 | FRIL_HUMAN  | Ferritin light chain              | 94.36 | -0.0166 |
| HLA-DP4 | KDGTYNWMSWLLVNTCA  | Trioxidation(C)@16                    | SIRB1_HUMAN | Signal-regulatory protein beta-1  | 94.78 | -0.0327 |
| HLA-DP4 | TNAFAFTQFGVLCAP    | Glutathione(C)@13                     | S43A3_HUMAN | Solute carrier family 43 member 3 | 93.93 | -0.0034 |
| HLA-DP4 | TNAFAFTQFGVLCA     | Trioxidation(C)@13                    | S43A3_HUMAN | Solute carrier family 43 member 3 | 94.39 | -0.0256 |

| CELL LINE-SCHU (DR2-DQ6) |                                     |                    |             |                                                                  |            |         |
|--------------------------|-------------------------------------|--------------------|-------------|------------------------------------------------------------------|------------|---------|
| Allele                   | Peptide                             | Modification       | Accession   | Protein                                                          | Confidence |         |
| HLA-DR2/DR51             | DAWDYVQAQVKCCG                      | Cys->Dha(C)@12     | CD82_HUMAN  | CD82 antigen                                                     | 97.12      | -0.0244 |
| HLA-DR2/DR51             | QDAWDYVQAQVKCCG                     | Cys->Dha(C)@13     | CD82_HUMAN  | CD82 antigen                                                     | 98.42      | -0.0138 |
| HLA-DR2/DR51             | QDAWDYVQAQVKCC                      | Cys->Dha(C)@13     | CD82_HUMAN  | CD82 antigen                                                     | 95.2       | -0.0284 |
| HLA-DR2/DR51             | APSGNYVACGGLDNICSIYNLKTREGN         | Cys->Dha(C)@9      | GBB1_HUMAN  | Guanine nucleotide-binding protein G(I)/G(S)/G(T) subunit beta-1 | 99         | -0.0158 |
| HLA-DR2/DR51             | APSGNYVACGGLDNICSIYNLKTREG          | Dioxidation(C)@9   | GBB1_HUMAN  | Guanine nucleotide-binding protein G(I)/G(S)/G(T) subunit beta-1 | 99         | -0.0131 |
| HLA-DR2/DR51             | AEQLRAYLDGTCVEWL                    | Glutathione(C)@12  | 1A03_HUMAN  | HLA class I histocompatibility antigen, A-3 alpha chain          | 97.7       | 0.002   |
| HLA-DR2/DR51             | EAEQLRAYLDGTCVEWL                   | Glutathione(C)@13  | 1A03_HUMAN  | HLA class I histocompatibility antigen, A-3 alpha chain          | 96.85      | -0.0172 |
| HLA-DR2/DR51             | KCWKIRHFPNEFIVETK                   | Glutathione(C)@2   | ITM2A_HUMAN | Integral membrane protein 2A                                     | 98.47      | -0.0015 |
| HLA-DR2/DR51             | NCNAIRHFENTF                        | Dioxidation(C)@2   | ITM2C_HUMAN | Integral membrane protein 2C                                     | 99         | -0.0089 |
| HLA-DR2/DR51             | NCNAIRHFENTFVVETL                   | Trioxidation(C)@2  | ITM2C_HUMAN | Integral membrane protein 2C                                     | 95.75      | 0.0012  |
| HLA-DR2/DR51             | NCNAIRHFENTFVVE                     | Trioxidation(C)@2  | ITM2C_HUMAN | Integral membrane protein 2C                                     | 96.97      | -0.006  |
| HLA-DR2/DR51             | DPYCGWDQGRCSISYSSERSV               | Cys->Dha(C)@4      | SEM7A_HUMAN | Semaphorin-7A                                                    | 99         | -0.0197 |
| HLA-DR2/DR51             | NPRDAKACVVHGSDL                     | Dioxidation(C)@8   | AT1A1_HUMAN | Sodium/potassium-transporting ATPase subunit alpha-1             | 99         | -0.0138 |
| HLA-DR2/DR51             | CTKTYHTEKAEDKQKLE                   | Dioxidation(C)@1   | TM9S2_HUMAN | Transmembrane 9 superfamily member 2                             | 99         | -0.0207 |
| HLA-DR2/DR51             | DEEKKSDECKAEIELFVNRLDSVE            | Glutathione(C)@9   | TM9S2_HUMAN | Transmembrane 9 superfamily member 2                             | 99         | 0       |
| HLA-DR2/DR51             | VQKWLLAAGAQKC                       | GlnThrGlyGly(C)@13 | TPP1_HUMAN  | Tripeptidyl-peptidase 1                                          | 97.86      | -0.0631 |
| HLA-DR2/DR51             | VQKWLLAAGAQKCHSV                    | Glutathione(C)@13  | TPP1_HUMAN  | Tripeptidyl-peptidase 1                                          | 96.46      | 0.0085  |
| HLA-DR2/DR51             | VQKWLLAAGAQKCH                      | Glutathione(C)@13  | TPP1_HUMAN  | Tripeptidyl-peptidase 1                                          | 99         | 0.0483  |
| HLA-DR2/DR51             | TVQKWLLAAGAQKCH                     | Glutathione(C)@14  | TPP1_HUMAN  | Tripeptidyl-peptidase 1                                          | 99         | 0.0295  |
| HLA-DQ6                  | IPQYCGSCWAHASTSA                    | Cys->Dha(C)@5      | CATZ_HUMAN  | Cathepsin Z                                                      | 99         | -0.0252 |
| HLA-DQ6                  | IPQYCGSCWAHASTS                     | Cys->Dha(C)@5      | CATZ_HUMAN  | Cathepsin Z                                                      | 99         | -0.0222 |
| HLA-DQ6                  | SPCQPDSGACQVAKSDEK                  | Cys->Dha(C)@3      | MPRI_HUMAN  | Cation-independent mannose-6-phosphate receptor                  | 99         | -0.0162 |
| HLA-DQ6                  | SPCQPDSGACQVAKSDEKT                 | Cys->Dha(C)@3      | MPRI_HUMAN  | Cation-independent mannose-6-phosphate receptor                  | 98.53      | -0.0244 |
| HLA-DQ6                  | VDMTCGGCAEAVSRV                     | Cys->Dha(C)@5      | ATOX1_HUMAN | Copper transport protein ATOX1                                   | 98.64      | -0.0128 |
| HLA-DQ6                  | VDMTCGGCAEAVSRVLN                   | Cys->Dha(C)@5      | ATOX1_HUMAN | Copper transport protein ATOX1                                   | 96.17      | -0.0302 |
| HLA-DQ6                  | KPIIGILMQKCRNKV                     | Dehydro(C)@11      | GGH_HUMAN   | Gamma-glutamyl hydrolase                                         | 99         | 0.0222  |
| HLA-DQ6                  | DIKHHCAAITPGRG                      | Dioxidation(C)@6   | GSLG1_HUMAN | Golgi apparatus protein 1                                        | 99         | -0.0227 |
| HLA-DQ6                  | GSTCCELPSTGKYG                      | Dehydrated(T)@3    | GRN_HUMAN   | Granulins                                                        | 95.88      | 0.0013  |
| HLA-DQ6                  | CPDGSTCCELPSTGKYG                   | Dioxidation(C)@1   | GRN_HUMAN   | Granulins                                                        | 96.03      | -0.018  |
| HLA-DQ6                  | APCEFGVLNSLANVLSQH                  | Trioxidation(C)@3  | DMB_HUMAN   | HLA class II histocompatibility antigen, DM beta chain           | 99         | -0.0477 |
| HLA-DQ6                  | SPSRTEALNHHNLLVCSVTDF               | Glutathione(C)@16  | DQB1_HUMAN  | HLA class II histocompatibility antigen, DQ beta 1 chain         | 98.2       | 0.0055  |
| HLA-DQ6                  | VGDVTGAQAYASTAKC                    | Glutathione(C)@16  | IFM2_HUMAN  | Interferon-induced transmembrane protein 2                       | 96.72      | 0.0015  |
| HLA-DQ6                  | DRKMVGDTVGAQAYASTAKC                | Glutathione(C)@20  | IFM2_HUMAN  | Interferon-induced transmembrane protein 2                       | 95.4       | -0.0096 |
| HLA-DQ6                  | DPLLDAGTTVLSCGCV                    | Cys->Dha(C)@13     | IL21R_HUMAN | Interleukin-21 receptor                                          | 97.98      | -0.0193 |
| HLA-DQ6                  | RPTGDVTHECACLPGFTGQ                 | Cys->Dha(C)@10     | NOTC1_HUMAN | Neurogenic locus notch homolog protein 1                         | 98.5       | -0.0319 |
| HLA-DQ6                  | GDVTHECACLPGFTGQ                    | Cys->Dha(C)@7      | NOTC1_HUMAN | Neurogenic locus notch homolog protein 1                         | 96.21      | -0.0152 |
| HLA-DQ6                  | NPRDAKACVVHGSD                      | Dioxidation(C)@8   | AT1A1_HUMAN | Sodium/potassium-transporting ATPase subunit alpha-1             | 96.77      | -0.0173 |
| HLA-DQ6                  | NPRDAKACVVHGSDL                     | Dioxidation(C)@8   | AT1A1_HUMAN | Sodium/potassium-transporting ATPase subunit alpha-1             | 96.92      | -0.0187 |
| HLA-DP4                  | HPAENGKSNFLNCYVSGFHPSDIEVDLLKNGERIE | Deamidated(N)@9    | B2MG_HUMAN  | Beta-2-microglobulin                                             | 96.28      | -0.0004 |
| HLA-DP4                  | HPAENGKSNFLNC                       | Dioxidation(C)@13  | B2MG_HUMAN  | Beta-2-microglobulin                                             | 99         | -0.0277 |
| HLA-DP4                  | HPAENGKSNFLNCYVSGFH                 | Dioxidation(C)@13  | B2MG_HUMAN  | Beta-2-microglobulin                                             | 98.68      | -0.0122 |
| HLA-DP4                  | IPQNFADYFETSSQCS                    | Dioxidation(C)@16  | CCL3_HUMAN  | C-C motif chemokine 3                                            | 96.46      | -0.0185 |

|                    |                      |                    |             |                                                              |       |         |
|--------------------|----------------------|--------------------|-------------|--------------------------------------------------------------|-------|---------|
| HLA-DP4            | IPQNFADYFETSSQC      | Glutathione(C)@16  | CCL3_HUMAN  | C-C motif chemokine 3                                        | 99    | 0.0038  |
| HLA-DP4            | IPQNFADYFETSSQCSKPS  | Dioxidation(C)@16  | CL3L1_HUMAN | C-C motif chemokine 3-like 1                                 | 99    | -0.0226 |
| HLA-DP4            | LPRNFVVDYETSSLCS     | Dioxidation(C)@16  | CCL4_HUMAN  | C-C motif chemokine 4                                        | 97.35 | -0.0239 |
| HLA-DP4            | IPQYCGSCWAHASTS      | Cys->Dha(C)@5      | CATZ_HUMAN  | Cathepsin Z                                                  | 99    | -0.0286 |
| HLA-DP4            | KCWKFEHCNFNDVTTR     | Cys->Dha(C)@2      | CD59_HUMAN  | CD59 glycoprotein                                            | 99    | -0.0321 |
| HLA-DP4            | CWKFEHCNFNDVTTR      | Dioxidation(C)@1   | CD59_HUMAN  | CD59 glycoprotein                                            | 99    | -0.0302 |
| HLA-DP4            | VVSGFCRSPPV          | Dioxidation(C)@6   | FLOT1_HUMAN | Flotillin-1                                                  | 99    | -0.021  |
| HLA-DP4            | PVNFKLLSHCLLVTL      | Cys->Ser@10        | HBA_HUMAN   | Hemoglobin subunit alpha                                     | 98.79 | -0.0076 |
| HLA-DP4            | LRVDPVNFKLLSHCLLVTLA | Cys->Ser@14        | HBA_HUMAN   | Hemoglobin subunit alpha                                     | 99    | -0.0113 |
| HLA-DP4            | SPSKKGPLQHNNLLVCH    | Dioxidation(C)@16  | DPB1_HUMAN  | HLA class II histocompatibility antigen, DP beta 1 chain     | 99    | -0.0245 |
| HLA-DP4            | AYAKSEEFVAVCRDGK     | Dioxidation(C)@11  | INGR1_HUMAN | Interferon gamma receptor 1                                  | 99    | -0.0232 |
| HLA-DP4            | SAYAKSEEFVAVCRDGK    | Dioxidation(C)@12  | INGR1_HUMAN | Interferon gamma receptor 1                                  | 98.14 | -0.0243 |
| HLA-DP4            | HQNTFLHDSFQNVAAVC    | Glutathione(C)@17  | RNAS6_HUMAN | Ribonuclease K6                                              | 99    | -0.019  |
| HLA-DP4            | YTNAFAFTQFGVLCA      | Trioxidation(C)@14 | S43A3_HUMAN | Solute carrier family 43 member 3                            | 97.53 | -0.0163 |
| HLA -A3/B7/Bw6/Cw7 | ISFPATGCQK           | Dioxidation(C)@8   | RS6_HUMAN   | 40S ribosomal protein S6                                     | 97.69 | -0.0238 |
| HLA -A3/B7/Bw6/Cw7 | SPALNKMFCQL          | Oxidation(M)@7     | P53_HUMAN   | Cellular tumor antigen p53                                   | 99    | -0.0032 |
| HLA -A3/B7/Bw6/Cw7 | KLCNIFSTKF           | Dioxidation(C)@3   | TOP2A_HUMAN | DNA topoisomerase 2-alpha                                    | 99    | -0.0248 |
| HLA -A3/B7/Bw6/Cw7 | VVCEYIVKK            | Dioxidation(C)@3   | IF2G_HUMAN  | Eukaryotic translation initiation factor 2 subunit 3         | 99    | -0.0235 |
| HLA -A3/B7/Bw6/Cw7 | TMCPHILRY            | Oxidation(M)@2     | EIF3E_HUMAN | Eukaryotic translation initiation factor 3 subunit E         | 98.83 | 0       |
| HLA -A3/B7/Bw6/Cw7 | CPLLKPWAL            | Dioxidation(C)@1   | ALDOA_HUMAN | Fructose-bisphosphate aldolase A                             | 98.06 | -0.024  |
| HLA -A3/B7/Bw6/Cw7 | RCLEEGKLVNK          | Dioxidation(C)@2   | NDUA8_HUMAN | NADH dehydrogenase [ubiquinone] 1 alpha subcomplex subunit 8 | 97.83 | -0.0197 |
| HLA -A3/B7/Bw6/Cw7 | CPAPGHPAL            | Dioxidation(C)@1   | NAB2_HUMAN  | NGFI-A-binding protein 2                                     | 99    | -0.0215 |
| HLA -A3/B7/Bw6/Cw7 | ILNSHCFAR            | Dioxidation(C)@6   | OAZ1_HUMAN  | Ornithine decarboxylase antizyme 1                           | 98.98 | -0.0202 |
| HLA -A3/B7/Bw6/Cw7 | RVCDIILPRL           | Dioxidation(C)@3   | PR38A_HUMAN | Pre-mRNA-splicing factor 38A                                 | 98.94 | -0.0225 |
| HLA -A3/B7/Bw6/Cw7 | IPANIGSLCV           | Dioxidation(C)@9   | PSYR_HUMAN  | Psychosine receptor                                          | 98.25 | 0.0548  |

## CELL LINE-STEINLIN (DR3-DQ2)

| Allele        | Peptide                   | Modification                            | Accession    | Protein                                                              | Confidence |         |
|---------------|---------------------------|-----------------------------------------|--------------|----------------------------------------------------------------------|------------|---------|
| HLA-DR3/DR52  | CCVLVFDVTAPNTFK           | Cys->Dha(C)@1; Dioxidation(C)@2         | RAB7A_HUMAN  | Ras-related protein Rab-7a                                           | 97.55      | 0.0082  |
| HLA-DR3/DR52  | CPPTVCQDPKEPRAL           | Cys->Dha(C)@1; Dioxidation(P)@3         | TRAF1_HUMAN  | TNF receptor-associated factor 1                                     | 96.3       | -0.0064 |
| HLA-DP3/4     | IDKFRGVEFVCCPL            | Cys->Dha(C)@11; Dioxidation(C)@12       | A4_HUMAN     | Amyloid beta A4 protein                                              | 99         | -0.022  |
| HLA-DP3/4     | VDQFHGTEYVCCPQ            | Cys->Dha(C)@11; Dioxidation(C)@12       | APLP2_HUMAN  | Amyloid-like protein 2                                               | 95.9       | -0.0199 |
| HLA-DP3/4     | VDQFHGTEYVCCP             | Cys->Dha(C)@11; Dioxidation(C)@12       | APLP2_HUMAN  | Amyloid-like protein 2                                               | 96.94      | -0.0088 |
| HLA-DR3/DR52  | GVGDLDEDPKPCPSSG          | Cys->Dha(C)@11; Dioxidation(C)@13       | KCNN3_HUMAN  | Small conductance calcium-activated potassium channel protein 3      | 99         | -0.019  |
| HLA-DP3/4     | GIDKFRGVEFVCCPL           | Cys->Dha(C)@12; Dioxidation(C)@13       | A4_HUMAN     | Amyloid beta A4 protein                                              | 95.47      | -0.0223 |
| HLA-DR3/DR52  | FPRWYYDPTEQICKSFVYGGCLG   | Cys->Dha(C)@13; Dioxidation(C)@21       | SPIT1_HUMAN  | Kunitz-type protease inhibitor 1                                     | 98.99      | -0.0307 |
| HLA-DR3/DR52  | NLREVTKDQSGKYCCQ          | Cys->Dha(C)@14; Dioxidation(C)@15       | CD22_HUMAN   | B-cell receptor CD22                                                 | 99         | -0.0071 |
| HLA-DR3/DR52  | ACDCKSDLQRP               | Cys->Dha(C)@2; Dioxidation(C)@4         | MUC13_HUMAN  | Mucin-13                                                             | 96.63      | -0.0188 |
| HLA-DR3/DR52  | GLACDCKSDLQRP             | Cys->Dha(C)@4; Dioxidation(C)@6         | MUC13_HUMAN  | Mucin-13                                                             | 99         | -0.0209 |
| HLA-DR3/DR52  | KPDCIITCDGKNLTIK          | Cys->Dha(C)@4; Dioxidation(C)@8         | FABP5_HUMAN  | Fatty acid-binding protein, epidermal                                | 99         | -0.0242 |
| HLA-DR3/DR52  | GNPKFKCHSGECITLDKVCNMARDC | Cys->Dha(C)@7; Dioxidation(C)@12        | LDLR_HUMAN   | Low-density lipoprotein receptor                                     | 99         | -0.0314 |
| HLA-DR3/DR52  | GNPKFKCHSGECITLDKVCNMARD  | Cys->Dha(C)@7; Dioxidation(C)@12        | LDLR_HUMAN   | Low-density lipoprotein receptor                                     | 99         | -0.0233 |
| HLA-DQ2       | KHFYWTSDSCPRPGVV          | Dehydrated(T)@6; Oxidation(C)@10        | CCL22_HUMAN  | C-C motif chemokine 22                                               | 97.41      | -0.0002 |
| HLA-DQ2       | VPRSGEVYTCQVEHPS          | Dehydro(C)@10                           | 2B13_HUMAN   | HLA class II histocompatibility antigen, DRB1-3 chain                | 99         | -0.0033 |
| HLA-DR3/DR52  | EKDCLNLDKNLIKYLQ          | Dehydro(C)@4                            | PTPRC_HUMAN  | Receptor-type tyrosine-protein phosphatase C                         | 97.66      | -0.0256 |
| HLA-DP3/4     | HLCDFLETHFLDEEVK          | Delta:H(2)C(2)(H)@1; Glutathione(C)@3   | FRIL_HUMAN   | Ferritin light chain                                                 | 96.7       | -0.0085 |
| HLA-A1,B3,Cw7 | KCPLLKPWAL                | Delta:H(2)C(2)(K)@1                     | ALDOA_HUMAN  | Fructose-bisphosphate aldolase A                                     | 98.26      | 0.0212  |
| HLA-A1,B3,Cw7 | KCLDPAQRALY               | Delta:H(2)C(2)(K)@1                     | ZN480_HUMAN  | Zinc finger protein 480                                              | 99         | -0.0124 |
| HLA-A1,B3,Cw7 | KCLDPAQRTRY               | Delta:H(2)C(2)(K)@1                     | ZN528_HUMAN  | Zinc finger protein 528                                              | 99         | -0.012  |
| HLA-A1,B3,Cw7 | NKCPLLKPWAL               | Delta:H(2)C(2)(K)@2                     | ALDOA_HUMAN  | Fructose-bisphosphate aldolase A                                     | 97.31      | 0.0438  |
| HLA-DR3/DR52  | KCKQLLQDEKAKCNKYA         | Delta:H(2)C(2)(K)@3                     | TAXB1_HUMAN  | Tax1-binding protein 1                                               | 99         | -0.013  |
| HLA-A1,B3,Cw7 | QCLDTAQDLY                | Delta:H(2)C(2)@N-term                   | ZN738_HUMAN  | Protein ZNF738                                                       | 99         | 0.0256  |
| HLA-DR3/DR52  | QCGNMFIDNKEIKLEN          | Delta:H(2)C(2)@N-term                   | PTPRC_HUMAN  | Receptor-type tyrosine-protein phosphatase C                         | 99         | 0.0204  |
| HLA-DR3/DR52  | CPIQDKTYSYLNK             | Dioxidation(C)@1                        | NPC2_HUMAN   | Epididymal secretory protein E1                                      | 96.1       | -0.0011 |
| HLA-DR3/DR52  | CEPDYLLDEAGRCT            | Dioxidation(C)@1                        | TNR8_HUMAN   | Tumor necrosis factor receptor superfamily member 8                  | 98.33      | -0.0058 |
| HLA-DR3/DR52  | CEPDYLLDEAGRCT            | Dioxidation(C)@1; Oxidation(P)@3        | TNR8_HUMAN   | Tumor necrosis factor receptor superfamily member 8                  | 96.34      | -0.0103 |
| HLA-A1,B3,Cw7 | IEFSLIEWQCLDTAQKNLY       | Dioxidation(C)@10                       | TNR726_HUMAN | Zinc finger protein 726                                              | 97.79      | 0.0285  |
| HLA-DR3/DR52  | FPRWYYDPTEQICKS           | Dioxidation(C)@13                       | SPIT1_HUMAN  | Kunitz-type protease inhibitor 1                                     | 99         | 0.0129  |
| HLA-DP3/4     | IPQNFIADYFETSSQCS         | Dioxidation(C)@16                       | CCL3_HUMAN   | C-C motif chemokine 3                                                | 97.66      | -0.0265 |
| HLA-DR3/DR52  | NFRGIVTDGRSGCTPCS         | Dioxidation(C)@16                       | AGRIN_HUMAN  | Agtrin                                                               | 98.69      | -0.0076 |
| HLA-DR3/DR52  | DCAQYFLDKIDVIKQ           | Dioxidation(C)@2                        | GNAS2_HUMAN  | Guanine nucleotide-binding protein G(s) subunit alpha isoforms short | 99         | -0.0183 |
| HLA-DR3/DR52  | DCAQYFLDKIDVIK            | Dioxidation(C)@2                        | GNAS2_HUMAN  | Guanine nucleotide-binding protein G(s) subunit alpha isoforms short | 99         | -0.0125 |
| HLA-DR3/DR52  | VCQALAKDPKLQQGYN          | Dioxidation(C)@2                        | PPT1_HUMAN   | Palmitoyl-protein thioesterase 1                                     | 99         | -0.0026 |
| HLA-DR3/DR52  | KCKQLLQDEKAKCNKYA         | Dioxidation(C)@2                        | TAXB1_HUMAN  | Tax1-binding protein 1                                               | 98.63      | -0.0012 |
| HLA-DR3/DR52  | SGCDLGPDRLLRGYD           | Dioxidation(C)@3                        | 1C07_HUMAN   | HLA class I histocompatibility antigen, Cw-7 alpha chain             | 99         | -0.0138 |
| HLA-DR3/DR52  | SGECITLDKVCNMARD          | Dioxidation(C)@4                        | LDLR_HUMAN   | Low-density lipoprotein receptor                                     | 99         | -0.0185 |
| HLA-DP3/4     | DPHLCDFLETHFLDEEVK        | Dioxidation(C)@5                        | FRIL_HUMAN   | Ferritin light chain                                                 | 97.15      | -0.0122 |
| HLA-DR3/DR52  | QCEPDYLLDEAGRCT           | Gln->pyro-Glu@N-term; Dehydro(C)@2      | TNR8_HUMAN   | Tumor necrosis factor receptor superfamily member 8                  | 99         | -0.0294 |
| HLA-A1,B3,Cw7 | QSENIAAHENCLLY            | Gln->pyro-Glu@N-term; Glutathione(C)@11 | PHF11_HUMAN  | PHD finger protein 11                                                | 99         | 0.002   |
| HLA-DR3/DR52  | QCEPDYLLDEAGRCT           | Gln->pyro-Glu@N-term; Glutathione(C)@2  | TNR8_HUMAN   | Tumor necrosis factor receptor superfamily member 8                  | 99         | 0.0013  |
| HLA-A1,B3,Cw7 | CLDTAQDLY                 | Glutathione(C)@1                        | ZN738_HUMAN  | Protein ZNF738                                                       | 99         | 0.0002  |
| HLA-A1,B3,Cw7 | CLDTSQQNLY                | Glutathione(C)@1                        | ZN273_HUMAN  | Zinc finger protein 273                                              | 99         | 0.0037  |
| HLA-A1,B3,Cw7 | CLDTAQRNLY                | Glutathione(C)@1                        | ZN626_HUMAN  | Zinc finger protein 626                                              | 99         | -0.0007 |
| HLA-DR3/DR52  | CPSDWKTDSTCRMVTS          | Glutathione(C)@1                        | TFR1_HUMAN   | Transferrin receptor protein 1                                       | 96.7       | -0.007  |

|               |                       |                   |             |                                                                      |       |         |
|---------------|-----------------------|-------------------|-------------|----------------------------------------------------------------------|-------|---------|
| HLA-DR3/DR52  | CPSDWKTDSTCRMVTS      | Glutathione(C)@1  | TFR1_HUMAN  | Transferrin receptor protein 1                                       | 99    | -0.0056 |
| HLA-DR3/DR52  | CEPDYLLDEAGRCT        | Glutathione(C)@1  | TNR8_HUMAN  | Tumor necrosis factor receptor superfamily member 8                  | 97.69 | -0.0098 |
| HLA-A1,B3,Cw7 | STDSGLGLGCY           | Glutathione(C)@10 | WWTR1_HUMAN | WW domain-containing transcription regulator protein 1               | 99    | 0.005   |
| HLA-DR3/DR52  | LVIDNGSGMC            | Glutathione(C)@10 | ACTG_HUMAN  | Actin, cytoplasmic 2                                                 | 96.82 | -0.0037 |
| HLA-DR3/DR52  | PSGEEQRYTCH           | Glutathione(C)@10 | 1B08_HUMAN  | HLA class I histocompatibility antigen, B-8 alpha chain              | 99    | -0.0007 |
| HLA-DR3/DR52  | PSGEEQRYTCH           | Glutathione(C)@10 | 1C07_HUMAN  | HLA class I histocompatibility antigen, Cw-7 alpha chain             | 96.27 | -0.0017 |
| HLA-DR3/DR52  | VPSGEEQRYTC           | Glutathione(C)@11 | 1B08_HUMAN  | HLA class I histocompatibility antigen, B-8 alpha chain              | 96.3  | -0.0054 |
| HLA-DR3/DR52  | MVDNEAIYDIC           | Glutathione(C)@11 | TBA1B_HUMAN | Tubulin alpha-1B chain                                               | 98.78 | -0.0028 |
| HLA-A1,B3,Cw7 | FTDGITNKLIGCY         | Glutathione(C)@12 | EK11_HUMAN  | Ethanolamine kinase 1                                                | 99    | -0.0059 |
| HLA-DP3/4     | VNPKMVMVTFACLMG       | Glutathione(C)@12 | PLSL_HUMAN  | Plastin-2                                                            | 97.05 | -0.0053 |
| HLA-DR3/DR52  | AALVVDNGSGMCK         | Glutathione(C)@12 | ACTB_HUMAN  | Actin, cytoplasmic 1                                                 | 99    | -0.0033 |
| HLA-DR3/DR52  | NIAYDVTYSLACV         | Glutathione(C)@12 | CCR7_HUMAN  | C-C chemokine receptor type 7                                        | 99    | -0.0145 |
| HLA-DR3/DR52  | NIAYDVTYSLAC          | Glutathione(C)@12 | CCR7_HUMAN  | C-C chemokine receptor type 7                                        | 99    | -0.004  |
| HLA-DR3/DR52  | IAALVVDNGSGMC         | Glutathione(C)@13 | ACTB_HUMAN  | Actin, cytoplasmic 1                                                 | 99    | -0.0031 |
| HLA-DR3/DR52  | IAALVVDNGSGMCK        | Glutathione(C)@13 | ACTB_HUMAN  | Actin, cytoplasmic 1                                                 | 99    | -0.0009 |
| HLA-DR3/DR52  | IAALVIDNGSGMC         | Glutathione(C)@13 | ACTG_HUMAN  | Actin, cytoplasmic 2                                                 | 99    | -0.0044 |
| HLA-DR3/DR52  | FPRWYYDPTEQICK        | Glutathione(C)@13 | SPIT1_HUMAN | Kunitz-type protease inhibitor 1                                     | 96.34 | -0.0043 |
| HLA-DR3/DR52  | FPRWYYDPTEQIC         | Glutathione(C)@13 | SPIT1_HUMAN | Kunitz-type protease inhibitor 1                                     | 96.34 | -0.0028 |
| HLA-DR3/DR52  | FPRWYYDPTEQICKS       | Glutathione(C)@13 | SPIT1_HUMAN | Kunitz-type protease inhibitor 1                                     | 96.53 | 0.012   |
| HLA-DR3/DR52  | AEREIVRDIKEKLCYVA     | Glutathione(C)@14 | ACTB_HUMAN  | Actin, cytoplasmic 1                                                 | 96.14 | -0.0046 |
| HLA-DR3/DR52  | LPFFDPDTNIVYLCG       | Glutathione(C)@14 | COR1A_HUMAN | Coronin-1A                                                           | 98.34 | -0.0055 |
| HLA-DR3/DR52  | KADIFVDPVLHTACA       | Glutathione(C)@14 | GSLG1_HUMAN | Golgi apparatus protein 1                                            | 99    | -0.0022 |
| HLA-DR3/DR52  | SDDFHLDRLHYFACR       | Glutathione(C)@14 | GSLG1_HUMAN | Golgi apparatus protein 1                                            | 99    | 0.0153  |
| HLA-DR3/DR52  | KADIFVDPVLHTAC        | Glutathione(C)@14 | GSLG1_HUMAN | Golgi apparatus protein 1                                            | 98.97 | 0.033   |
| HLA-DR3/DR52  | LLPALQEDSGTYVC        | Glutathione(C)@14 | IL1R2_HUMAN | Interleukin-1 receptor type 2                                        | 97.8  | -0.0305 |
| HLA-DR3/DR52  | FREHLVRDSVFQRCGLR     | Glutathione(C)@14 | PRRT3_HUMAN | Proline-rich transmembrane protein 3                                 | 99    | -0.0011 |
| HLA-DR3/DR52  | GPQVYKCDPAGYYCG       | Glutathione(C)@14 | PSA6_HUMAN  | Proteasome subunit alpha type-6                                      | 99    | -0.0048 |
| HLA-DR3/DR52  | GPQVYKCDPAGYYC        | Glutathione(C)@14 | PSA6_HUMAN  | Proteasome subunit alpha type-6                                      | 99    | -0.0042 |
| HLA-DQ2       | IDQYFSGDDIDEDPC       | Glutathione(C)@15 | IMA3_HUMAN  | Importin subunit alpha-3                                             | 99    | 0.0137  |
| HLA-DR3/DR52  | KQLNIAYDVTYSLAC       | Glutathione(C)@15 | CCR7_HUMAN  | C-C chemokine receptor type 7                                        | 98.59 | -0.0026 |
| HLA-DR3/DR52  | APLSVFEGDSVLLRCRAK    | Glutathione(C)@15 | FCRL5_HUMAN | Fc receptor-like protein 5                                           | 99    | -0.0025 |
| HLA-DR3/DR52  | SALDYRLDPQLQLHC       | Glutathione(C)@15 | GSLG1_HUMAN | Golgi apparatus protein 1                                            | 99    | -0.0084 |
| HLA-DR3/DR52  | SKADIFVDPVLHTACAL     | Glutathione(C)@15 | GSLG1_HUMAN | Golgi apparatus protein 1                                            | 99    | -0.0042 |
| HLA-DR3/DR52  | ISRDWKLDPVLYRKQCG     | Glutathione(C)@15 | GSLG1_HUMAN | Golgi apparatus protein 1                                            | 98.3  | -0.0014 |
| HLA-DR3/DR52  | SKADIFVDPVLHTACA      | Glutathione(C)@15 | GSLG1_HUMAN | Golgi apparatus protein 1                                            | 97.21 | 0.0066  |
| HLA-DP3/4     | IPQNFADYFETSSQCSKPG   | Glutathione(C)@16 | CCL3_HUMAN  | C-C motif chemokine 3                                                | 95.72 | -0.0109 |
| HLA-DR3/DR52  | LPTPKVIGIDLGTTCYCVG   | Glutathione(C)@16 | HSP13_HUMAN | Heat shock 70 kDa protein 13                                         | 99    | -0.0045 |
| HLA-DQ2       | IATGKMLSLAEQQLVDC     | Glutathione(C)@17 | CATH_HUMAN  | Pro-cathepsin H                                                      | 97.98 | -0.0132 |
| HLA-DQ2       | SPEPEAEAAAAGPGPC      | Glutathione(C)@17 | SQSTM_HUMAN | Sequestosome-1                                                       | 98.01 | -0.0027 |
| HLA-DQ2       | DPTDGSILACDPGLSRTCDQ  | Glutathione(C)@18 | ITAL_HUMAN  | Integrin alpha-L                                                     | 96.63 | 0.0041  |
| HLA-DR3/DR52  | LPLTPKVIGIDLGTTCYCVG  | Glutathione(C)@18 | HSP13_HUMAN | Heat shock 70 kDa protein 13                                         | 99    | -0.0149 |
| HLA-DR3/DR52  | DPTDGSILACDPGLSRTCDQN | Glutathione(C)@18 | ITAL_HUMAN  | Integrin alpha-L                                                     | 99    | -0.0082 |
| HLA-DR3/DR52  | DPTDGSILACDPGLSRTCD   | Glutathione(C)@18 | ITAL_HUMAN  | Integrin alpha-L                                                     | 99    | -0.0064 |
| HLA-DR3/DR52  | DPTDGSILACDPGLSRTCDQ  | Glutathione(C)@18 | ITAL_HUMAN  | Integrin alpha-L                                                     | 99    | -0.0056 |
| HLA-DR3/DR52  | DPTDGSILACDPGLSRTC    | Glutathione(C)@18 | ITAL_HUMAN  | Integrin alpha-L                                                     | 99    | 0.0041  |
| HLA-DR3/DR52  | DCAQYFLDKIDVIKQ       | Glutathione(C)@2  | GNAS2_HUMAN | Guanine nucleotide-binding protein G(s) subunit alpha isoforms short | 99    | 0.0383  |
| HLA-DR3/DR52  | GCDVGPDRLLRGHNQ       | Glutathione(C)@2  | 1B08_HUMAN  | HLA class I histocompatibility antigen, B-8 alpha chain              | 99    | -0.0012 |
| HLA-DR3/DR52  | KCKQLLQDEKAKCNKYA     | Glutathione(C)@2  | TAXB1_HUMAN | Tax1-binding protein 1                                               | 98.78 | 0.0009  |

|               |                      |                  |             |                                                                      |       |         |
|---------------|----------------------|------------------|-------------|----------------------------------------------------------------------|-------|---------|
| HLA-DR3/DR52  | DCPSDWKTDSTCRMVTSE   | Glutathione(C)@2 | TFR1_HUMAN  | Transferrin receptor protein 1                                       | 99    | -0.0083 |
| HLA-DR3/DR52  | DCPSDWKTDSTCRMVTS    | Glutathione(C)@2 | TFR1_HUMAN  | Transferrin receptor protein 1                                       | 99    | -0.0076 |
| HLA-A1,B3,Cw7 | TSCADTLRY            | Glutathione(C)@3 | MGRN1_HUMAN | E3 ubiquitin-protein ligase MGRN1                                    | 98.65 | 0.0004  |
| HLA-DP3/4     | IPCEKVSTLPAILK       | Glutathione(C)@3 | CATD_HUMAN  | Cathepsin D                                                          | 98.12 | 0.0118  |
| HLA-DP3/4     | IPCEKVSTLPAILKL      | Glutathione(C)@3 | CATD_HUMAN  | Cathepsin D                                                          | 98.55 | -0.0015 |
| HLA-DR3/DR52  | INCPIQKDKTYSYLNK     | Glutathione(C)@3 | NPC2_HUMAN  | Epididymal secretory protein E1                                      | 98.85 | 0.0006  |
| HLA-DR3/DR52  | IDCAQYFLDKIDVIK      | Glutathione(C)@3 | GNAS2_HUMAN | Guanine nucleotide-binding protein G(s) subunit alpha isoforms short | 99    | -0.0131 |
| HLA-DR3/DR52  | IDCAQYFLDKIDVIKQ     | Glutathione(C)@3 | GNAS2_HUMAN | Guanine nucleotide-binding protein G(s) subunit alpha isoforms short | 99    | -0.0129 |
| HLA-DR3/DR52  | YGCDVGPDRLLRGHNQY    | Glutathione(C)@3 | 1B08_HUMAN  | HLA class I histocompatibility antigen, B-8 alpha chain              | 96.02 | 0.004   |
| HLA-DR3/DR52  | SPCPRELGPDPLLARHLEE  | Glutathione(C)@3 | IL4RA_HUMAN | Interleukin-4 receptor subunit alpha                                 | 99    | 0.0035  |
| HLA-DR3/DR52  | GECITLDKVCNMAR       | Glutathione(C)@3 | LDLR_HUMAN  | Low-density lipoprotein receptor                                     | 98.13 | -0.0067 |
| HLA-DR3/DR52  | GECITLDKVCNMARD      | Glutathione(C)@3 | LDLR_HUMAN  | Low-density lipoprotein receptor                                     | 97.85 | -0.006  |
| HLA-DR3/DR52  | NKCKQLLQDEKAKCNKYA   | Glutathione(C)@3 | TAXB1_HUMAN | Tax1-binding protein 1                                               | 98.56 | 0.0031  |
| HLA-DR3/DR52  | GDCPSDWKTDSTCRMVTSE  | Glutathione(C)@3 | TFR1_HUMAN  | Transferrin receptor protein 1                                       | 99    | -0.0082 |
| HLA-DR3/DR52  | GDCPSDWKTDSTCRMVTS   | Glutathione(C)@3 | TFR1_HUMAN  | Transferrin receptor protein 1                                       | 99    | -0.0049 |
| HLA-A1,B3,Cw7 | LVDCSTEKY            | Glutathione(C)@4 | CATS_HUMAN  | Cathepsin S                                                          | 98.51 | -0.0035 |
| HLA-A1,B3,Cw7 | GSDCTTIHY            | Glutathione(C)@4 | P53_HUMAN   | Cellular tumor antigen p53                                           | 99    | 0.0013  |
| HLA-A1,B3,Cw7 | VTECEKYAQLY          | Glutathione(C)@4 | CUL9_HUMAN  | Cullin-9                                                             | 99    | -0.0027 |
| HLA-A1,B3,Cw7 | RSDCLGEHLY           | Glutathione(C)@4 | ICLN_HUMAN  | Methylosome subunit pICln                                            | 99    | -0.0023 |
| HLA-A1,B3,Cw7 | VSGCPLPEACELY        | Glutathione(C)@4 | NAT10_HUMAN | N-acetyltransferase 10                                               | 98    | -0.0061 |
| HLA-A1,B3,Cw7 | QTDCAPNNGY           | Glutathione(C)@4 | NOMO3_HUMAN | Nodal modulator 3                                                    | 99    | -0.0047 |
| HLA-A1,B3,Cw7 | DMICRAHQL            | Glutathione(C)@4 | PP4C_HUMAN  | Serine/threonine-protein phosphatase 4 catalytic subunit             | 98.61 | -0.0025 |
| HLA-A1,B3,Cw7 | DLICRAHQV            | Glutathione(C)@4 | PP1B_HUMAN  | Serine/threonine-protein phosphatase PP1-beta catalytic subunit      | 99    | 0.0002  |
| HLA-DR3/DR52  | SGECITLDKVCNMARD     | Glutathione(C)@4 | LDLR_HUMAN  | Low-density lipoprotein receptor                                     | 99    | -0.0012 |
| HLA-DR3/DR52  | EKDCLNLDKNLIKIDLQ    | Glutathione(C)@4 | PTPRC_HUMAN | Receptor-type tyrosine-protein phosphatase C                         | 95.96 | -0.0023 |
| HLA-DR3/DR52  | SPHCPVYVPDPTSTIKPGPN | Glutathione(C)@4 | HCK_HUMAN   | Tyrosine-protein kinase HCK                                          | 98.4  | -0.003  |
| HLA-A1,B3,Cw7 | ASEVCPPPGY           | Glutathione(C)@5 | PIAS3_HUMAN | E3 SUMO-protein ligase PIAS3                                         | 99    | -0.0007 |
| HLA-A1,B3,Cw7 | YTDLCMFEY            | Glutathione(C)@5 | IF122_HUMAN | Intraflagellar transport protein 122 homolog                         | 99    | -0.0036 |
| HLA-DP3/4     | DPHLCDFLETHFLDEEVK   | Glutathione(C)@5 | FRIL_HUMAN  | Ferritin light chain                                                 | 99    | -0.0078 |
| HLA-A1,B3,Cw7 | VTENECQNY            | Glutathione(C)@6 | BECN1_HUMAN | Beclin-1                                                             | 99    | -0.0009 |
| HLA-A1,B3,Cw7 | HTDFHCNEY            | Glutathione(C)@6 | DCA17_HUMAN | DDB1- and CUL4-associated factor 17                                  | 99    | 0.0076  |
| HLA-A1,B3,Cw7 | LTESPCALVASQY        | Glutathione(C)@6 | ENPL_HUMAN  | Endoplasmin                                                          | 99    | 0.0014  |
| HLA-A1,B3,Cw7 | LADLSCLVY            | Glutathione(C)@6 | ERH_HUMAN   | Enhancer of rudimentary homolog                                      | 96.87 | -0.0076 |
| HLA-A1,B3,Cw7 | KLDTLCDLY            | Glutathione(C)@6 | IF4A1_HUMAN | Eukaryotic initiation factor 4A-I                                    | 98.82 | -0.0017 |
| HLA-A1,B3,Cw7 | MLKEVCTAL            | Glutathione(C)@6 | SRP54_HUMAN | Signal recognition particle 54 kDa protein                           | 97.38 | 0.0003  |
| HLA-A1,B3,Cw7 | NSELSCQLY            | Glutathione(C)@6 | TYSY_HUMAN  | Thymidylate synthase                                                 | 99    | -0.0004 |
| HLA-DR3/DR52  | LADLSCLVY            | Glutathione(C)@6 | ERH_HUMAN   | Enhancer of rudimentary homolog                                      | 99    | -0.0039 |
| HLA-A1,B3,Cw7 | ISDPSNCSQY           | Glutathione(C)@7 | HSF2_HUMAN  | Heat shock factor protein 2                                          | 99    | 0.0029  |
| HLA-A1,B3,Cw7 | ESDAVECLNY           | Glutathione(C)@7 | HNRPK_HUMAN | Heterogeneous nuclear ribonucleoprotein K                            | 96.77 | -0.0023 |
| HLA-A1,B3,Cw7 | VSDNGPCLGY           | Glutathione(C)@7 | ACSL5_HUMAN | Long-chain-fatty-acid--CoA ligase 5                                  | 99    | 0.002   |
| HLA-A1,B3,Cw7 | VTDDLVCVLY           | Glutathione(C)@7 | SRP09_HUMAN | Signal recognition particle 9 kDa protein                            | 98.33 | -0.0095 |
| HLA-A1,B3,Cw7 | ESENVVCHFY           | Glutathione(C)@7 | TXND9_HUMAN | Thioredoxin domain-containing protein 9                              | 99    | 0.0073  |
| HLA-A1,B3,Cw7 | NIELGTACGKYY         | Glutathione(C)@8 | RL30_HUMAN  | 60S ribosomal protein L30                                            | 99    | 0.0013  |
| HLA-A1,B3,Cw7 | FLDTRTICY            | Glutathione(C)@8 | ATPF2_HUMAN | ATP synthase mitochondrial F1 complex assembly factor 2              | 97.21 | 0.0008  |
| HLA-A1,B3,Cw7 | MSDTAGTCY            | Glutathione(C)@8 | IGHM_HUMAN  | Ig mu chain C region                                                 | 99    | 0.0015  |
| HLA-A1,B3,Cw7 | QSELPVTCGEVKGTLY     | Glutathione(C)@8 | SP100_HUMAN | Nuclear autoantigen Sp-100                                           | 98.15 | 0.0076  |
| HLA-A1,B3,Cw7 | FTEMDELGY            | Glutathione(C)@8 | S4A7_HUMAN  | Sodium bicarbonate cotransporter 3                                   | 97.01 | 0.0068  |
| HLA-A1,B3,Cw7 | ASDSGKYLGY           | Glutathione(C)@9 | BT3A1_HUMAN | Butyrophilin subfamily 3 member A1                                   | 99    | 0.0012  |

|               |                             |                                                                    |             |                                                                      |       |         |
|---------------|-----------------------------|--------------------------------------------------------------------|-------------|----------------------------------------------------------------------|-------|---------|
| HLA-A1,B3,Cw7 | LLDQGTSQCY                  | Glutathione(C)@9                                                   | GNPAT_HUMAN | Dihydroxyacetone phosphate acyltransferase                           | 99    | 0       |
| HLA-A1,B3,Cw7 | NTDSSALDCY                  | Glutathione(C)@9                                                   | KEAP1_HUMAN | Kelch-like ECH-associated protein 1                                  | 99    | -0.0025 |
| HLA-A1,B3,Cw7 | YSDLASLGCSIRY               | Glutathione(C)@9                                                   | SC24A_HUMAN | Protein transport protein Sec24A                                     | 99    | -0.0057 |
| HLA-A1,B3,Cw7 | ATDASSLVCY                  | Glutathione(C)@9                                                   | S4A7_HUMAN  | Sodium bicarbonate cotransporter 3                                   | 99    | -0.0046 |
| HLA-DQ2       | LFGNMEGDCPSDWKT             | Glutathione(C)@9; Oxidation(P)@10                                  | TFR1_HUMAN  | Transferrin receptor protein 1                                       | 97.11 | -0.0043 |
| HLA-DR3/DR52  | AEREIVRDIKEKLCYVA           | Oxidation(C)@14; Dioxidation(Y)@15                                 | ACTB_HUMAN  | Actin, cytoplasmic 1                                                 | 99    | -0.0205 |
| HLA-DR3/DR52  | DPTDGSILACDPGLSRTCDQNT      | Oxidation(C)@18; Deamidated(Q)@20; Deamidated(N)@21                | ITAL_HUMAN  | Integrin alpha-L                                                     | 99    | 0.0387  |
| HLA-DP3/4     | AGPGPCERLLSRVAALFPALRPG     | Oxidation(P)@3; Dioxidation(C)@6                                   | SQSTM_HUMAN | Sequestosome-1                                                       | 96.83 | -0.019  |
| HLA-DP3/4     | TWACSHSMRYFDTAVSRPG         | Oxidation(W)@2; Methyl(C)@4                                        | 1C07_HUMAN  | HLA class I histocompatibility antigen, Cw-7 alpha chain             | 97.84 | 0.0027  |
| HLA-DR3/DR52  | DDIAALVVDNGSGMCKAG          | Protein Terminal Acetyl@N-term; Dioxidation(C)@16; Oxidation(K)@17 | ACTB_HUMAN  | Actin, cytoplasmic 1                                                 | 99    | -0.0139 |
| HLA-DR3/DR52  | DDIAALVVDNGSGMCKA           | Protein Terminal Acetyl@N-term; Dioxidation(C)@16; Oxidation(K)@17 | ACTB_HUMAN  | Actin, cytoplasmic 1                                                 | 98.74 | 0.0034  |
| HLA-DR3/DR52  | DDIAALVVDNGSGMCKA           | Protein Terminal Acetyl@N-term; Dioxidation(C)@16; Oxidation(K)@17 | ACTB_HUMAN  | Actin, cytoplasmic 1                                                 | 99    | 0.0171  |
| HLA-DR3/DR52  | EEEIAALVIDNGSGMCKA          | Protein Terminal Acetyl@N-term; Dioxidation(C)@16; Oxidation(K)@17 | ACTG_HUMAN  | Actin, cytoplasmic 2                                                 | 98.68 | -0.032  |
| HLA-DR3/DR52  | EEEIAALVIDNGSGMCKA          | Protein Terminal Acetyl@N-term; Dioxidation(M)@15; Oxidation(C)@16 | ACTG_HUMAN  | Actin, cytoplasmic 2                                                 | 98.35 | -0.0256 |
| HLA-DR3/DR52  | DDIAALVVDNGSGMCK            | Protein Terminal Acetyl@N-term; Glutathione(C)@16                  | ACTB_HUMAN  | Actin, cytoplasmic 1                                                 | 99    | -0.0147 |
| HLA-DR3/DR52  | DDIAALVVDNGSGMCK            | Protein Terminal Acetyl@N-term; Glutathione(C)@16                  | ACTB_HUMAN  | Actin, cytoplasmic 1                                                 | 99    | -0.0022 |
| HLA-DR3/DR52  | DDIAALVVDNGSGMCKA           | Protein Terminal Acetyl@N-term; Glutathione(C)@16                  | ACTB_HUMAN  | Actin, cytoplasmic 1                                                 | 99    | -0.0015 |
| HLA-DR3/DR52  | DDIAALVVDNGSGMCKAG          | Protein Terminal Acetyl@N-term; Glutathione(C)@16                  | ACTB_HUMAN  | Actin, cytoplasmic 1                                                 | 99    | 0.0066  |
| HLA-DR3/DR52  | EEEIAALVIDNGSGMCKAGFAGDDAPR | Protein Terminal Acetyl@N-term; Glutathione(C)@16                  | ACTG_HUMAN  | Actin, cytoplasmic 2                                                 | 99    | -0.0246 |
| HLA-DR3/DR52  | EEEIAALVIDNGSGMCK           | Protein Terminal Acetyl@N-term; Glutathione(C)@16                  | ACTG_HUMAN  | Actin, cytoplasmic 2                                                 | 99    | -0.013  |
| HLA-DR3/DR52  | EEEIAALVIDNGSGMCKAG         | Protein Terminal Acetyl@N-term; Glutathione(C)@16                  | ACTG_HUMAN  | Actin, cytoplasmic 2                                                 | 98.26 | -0.0103 |
| HLA-DR3/DR52  | EEEIAALVIDNGSGMCK           | Protein Terminal Acetyl@N-term; Glutathione(C)@16                  | ACTG_HUMAN  | Actin, cytoplasmic 2                                                 | 99    | -0.0086 |
| HLA-DR3/DR52  | SKGPAVGIDLGTYSVCG           | Protein Terminal Acetyl@N-term; Glutathione(C)@16                  | HSP7C_HUMAN | Heat shock cognate 71 kDa protein                                    | 98.57 | -0.0053 |
| HLA-DP3/4     | DDIAALVVDNGSGMCKA           | Protein Terminal Acetyl@N-term; Trioxidation(C)@16                 | ACTB_HUMAN  | Actin, cytoplasmic 1                                                 | 99    | 0.0002  |
| HLA-DR3/DR52  | CPIQDKTYSYLNK               | Trioxidation(C)@1                                                  | NPC2_HUMAN  | Epididymal secretory protein E1                                      | 99    | 0.0015  |
| HLA-DR3/DR52  | CPPTVCQDPKEPRAL             | Trioxidation(C)@1                                                  | TRAF1_HUMAN | TNF receptor-associated factor 1                                     | 99    | -0.0046 |
| HLA-DR3/DR52  | CPSDWKTDSTCRMVTS            | Trioxidation(C)@1                                                  | TFR1_HUMAN  | Transferrin receptor protein 1                                       | 97.58 | -0.0049 |
| HLA-DR3/DR52  | CPSDWKTDSTCRMVTS            | Trioxidation(C)@1                                                  | TFR1_HUMAN  | Transferrin receptor protein 1                                       | 99    | -0.0021 |
| HLA-DR3/DR52  | CPSDWKTDSTCRM               | Trioxidation(C)@1                                                  | TFR1_HUMAN  | Transferrin receptor protein 1                                       | 98.12 | -0.0021 |
| HLA-DR3/DR52  | CEPDYLLDEAGRCT              | Trioxidation(C)@1                                                  | TNR8_HUMAN  | Tumor necrosis factor receptor superfamily member 8                  | 99    | -0.0103 |
| HLA-DR3/DR52  | CRKQCEPDYLLDEAGRCT          | Trioxidation(C)@1                                                  | TNR8_HUMAN  | Tumor necrosis factor receptor superfamily member 8                  | 95.89 | 0.003   |
| HLA-DQ2       | LPSTEDVYDCRVEHWG            | Trioxidation(C)@10                                                 | DRA_HUMAN   | HLA class II histocompatibility antigen, DR alpha chain              | 99    | -0.0044 |
| HLA-DQ2       | LPSTEDVYDCRVEHWG            | Trioxidation(C)@10; Oxidation(W)@15                                | DRA_HUMAN   | HLA class II histocompatibility antigen, DR alpha chain              | 98.57 | -0.0012 |
| HLA-A1,B3,Cw7 | ASEEARSLRECELY              | Trioxidation(C)@11                                                 | KAPO_HUMAN  | cAMP-dependent protein kinase type I-alpha regulatory subunit        | 99    | -0.0002 |
| HLA-DR3/DR52  | AALVVDNGSGMCKA              | Trioxidation(C)@12                                                 | ACTB_HUMAN  | Actin, cytoplasmic 1                                                 | 99    | -0.0269 |
| HLA-DP3/4     | TNAFAFTQFGVLCA              | Trioxidation(C)@13                                                 | S43A3_HUMAN | Solute carrier family 43 member 3                                    | 97.38 | -0.0214 |
| HLA-DR3/DR52  | DDIAALVVDNGSGMCKA           | Trioxidation(C)@15                                                 | ACTB_HUMAN  | Actin, cytoplasmic 1                                                 | 99    | -0.0154 |
| HLA-DR3/DR52  | DCAQYFLDKIDVIK              | Trioxidation(C)@2                                                  | GNAS2_HUMAN | Guanine nucleotide-binding protein G(s) subunit alpha isoforms short | 99    | -0.0083 |
| HLA-DR3/DR52  | DCAQYFLDKIDVIKQ             | Trioxidation(C)@2                                                  | GNAS2_HUMAN | Guanine nucleotide-binding protein G(s) subunit alpha isoforms short | 99    | -0.0035 |
| HLA-DR3/DR52  | GCDLGPDRLLRQYD              | Trioxidation(C)@2                                                  | 1C07_HUMAN  | HLA class I histocompatibility antigen, Cw-7 alpha chain             | 97.2  | -0.0027 |
| HLA-DR3/DR52  | YGCDVGPDRLLRQYD             | Trioxidation(C)@3                                                  | 1B08_HUMAN  | HLA class I histocompatibility antigen, B-8 alpha chain              | 99    | 0.0071  |
| HLA-DP3/4     | DPHLCDFLETHFLDEEVK          | Trioxidation(C)@5                                                  | FRIL_HUMAN  | Ferritin light chain                                                 | 99    | -0.0097 |
| HLA-DP3/4     | GPGPCERLLSRVAALFPALRPG      | Trioxidation(C)@5                                                  | SQSTM_HUMAN | Sequestosome-1                                                       | 99    | -0.0109 |
| HLA-DR3/DR52  | AKPDCIITCDGKNLTIKTE         | Trioxidation(C)@5                                                  | FABP5_HUMAN | Fatty acid-binding protein, epidermal                                | 99    | -0.0223 |
| HLA-DR3/DR52  | EGQVISCLKLRVADQR            | Trioxidation(C)@7                                                  | GSLG1_HUMAN | Golgi apparatus protein 1                                            | 99    | -0.0041 |
| HLA-DQ2       | VGGFYGGCNEALMK              | Trioxidation(C)@8                                                  | CATC_HUMAN  | Dipeptidyl peptidase 1                                               | 95.63 | 0.0047  |



## CLASS I TRANSFECTANTS

| Allele    | Peptide             | Modification                         | Accession    | Protein                                                                           | Confidence |         |
|-----------|---------------------|--------------------------------------|--------------|-----------------------------------------------------------------------------------|------------|---------|
| HLA-B5701 | CPGCSTGGARSW        | Cys->Dha(C)@1; Dioxidation(P)@2      | PDD2L_HUMAN  | Programmed cell death protein 2-like                                              | 97.31      | -0.0211 |
| HLA-B5701 | DTLRYQANNCPICR      | Cys->Dha(C)@10; Dioxidation(C)@13    | MGRN1_HUMAN  | E3 ubiquitin-protein ligase MGRN1                                                 | 99         | -0.0254 |
| HLA-B5701 | SCSVTQTGVQW         | Cys->Dha(C)@2                        | SELN_HUMAN   | Selenoprotein N                                                                   | 99         | 0.0483  |
| HLA-B5703 | DCPPPPPPP           | Cys->Dha(C)@2                        | B4DSP0_HUMAN | HCG1642748, isoform CRA_b cDNA FLJ56638                                           | 99         | 0.0379  |
| HLA-B5703 | SCSVAQAGVQW         | Cys->Dha(C)@2                        | Q9P147_HUMAN | PRO2822 - Homo sapiens (Human). OK/SW-CL.87 Putative uncharacterized protein      | 95.51      | 0.0099  |
| HLA-B5703 | SCSVTQAGVQW         | Cys->Dha(C)@2                        | Q659F1_HUMAN | Putative uncharacterized protein DKFZp434K213                                     | 98.12      | 0.0498  |
| HLA-B5703 | SCSVTQTGVQW         | Cys->Dha(C)@2                        | SELN_HUMAN   | Selenoprotein N                                                                   | 98.31      | 0.042   |
| HLA-B5801 | SCSVAQAGVQW         | Cys->Dha(C)@2                        | Q8NI68_HUMAN | OK/SW-CL.87                                                                       | 96.33      | 0.04    |
| HLA-B5801 | SCSVTQTGVQW         | Cys->Dha(C)@2                        | SELN_HUMAN   | Selenoprotein N                                                                   | 95.66      | 0.048   |
| HLA-B5701 | ACPGCSTGGARSW       | Cys->Dha(C)@2; Dioxidation(C)@5      | PDD2L_HUMAN  | Programmed cell death protein 2-like                                              | 99         | -0.0211 |
| HLA-B5703 | EGCSSPIVVKF         | Cys->Dha(C)@3                        | Q5VZZ6_HUMAN | CUG triplet repeat, RNA binding protein 2                                         | 98.48      | 0.0418  |
| HLA-B5703 | PDCPPPPPP           | Cys->Dha(C)@3                        | B4DSP0_HUMAN | HCG1642748, isoform CRA_b cDNA FLJ56638                                           | 99         | 0.0349  |
| HLA-B5703 | QSCFFSGRTAK         | Cys->Dha(C)@3                        | UTRO_HUMAN   | Utrophin                                                                          | 95.67      | -0.0478 |
| HLA-B5703 | MLCSVGASKAVFLW      | Cys->Dha(C)@3                        | WSB1_HUMAN   | WD repeat and SOCS box-containing protein 1                                       | 97.7       | 0.0172  |
| HLA-B5801 | SPCQPDGACQVAKSDE    | Cys->Dha(C)@3; Dioxidation(C)@10     | Q59EZ3_HUMAN | Insulin-like growth factor 2 receptor variant                                     | 99         | -0.0157 |
| HLA-B5703 | YTCFSGKTKM          | Cys->Dha(C)@3; Dioxidation(C)@6      | RL37A_HUMAN  | 60S ribosomal protein L37a                                                        | 99         | -0.0054 |
| HLA-B5703 | SSPVCQTRF           | Cys->Dha(C)@3; Dioxidation(C)@6      | TRI22_HUMAN  | E3 ubiquitin-protein ligase TRIM22                                                | 99         | -0.0198 |
| HLA-B5703 | AACPFCAHQL          | Cys->Dha(C)@3; Dioxidation(C)@6      | PEL1_HUMAN   | Protein pellino homolog 1                                                         | 99         | -0.0245 |
| HLA-B5701 | ASCSQDCLIRIW        | Cys->Dha(C)@3; Dioxidation(C)@7      | ELP2_HUMAN   | Elongator complex protein 2                                                       | 99         | -0.0237 |
| HLA-B5701 | GFSVCGQISIIRF       | Cys->Dha(C)@5                        | NOMO3_HUMAN  | Nodal modulator 3                                                                 | 98.63      | -0.0141 |
| HLA-B5703 | GFSVCGQISIIRF       | Cys->Dha(C)@5                        | NOMO1_HUMAN  | Nodal modulator 1                                                                 | 98.43      | -0.0103 |
| HLA-1502  | AGALCAGHIAGLY       | Cys->Dha(C)@5                        | Q9H2L7_HUMAN | DC33                                                                              | 97.66      | -0.0568 |
| HLA-B5801 | HSVMCKICEQF         | Cys->Dha(C)@5; Dioxidation(C)@8      | B7Z2P6_HUMAN | cDNA FLJ55296, highly similar to Homo sapiens WD repeat domain 42A (WDR42A), mRNA | 99         | -0.0182 |
| HLA-B5801 | LLFETGSCSVAQAGVQW   | Cys->Dha(C)@8                        | Q8NI68_HUMAN | OK/SW-CL.87                                                                       | 99         | 0.0307  |
| HLA-B5801 | KMFSEADACELW        | Cys->Dha(C)@9; Dioxidation(W)@12     | SPTB2_HUMAN  | Spectrin beta chain, brain 1                                                      | 99         | -0.0302 |
| HLA-1502  | EGAHARVQTCINLITSQEY | Dehydro(C)@10                        | MKNK2_HUMAN  | MAP kinase-interacting serine/threonine-protein kinase 2                          | 99         | -0.0419 |
| HLA-B5703 | CIDCTTNFSCYTGKPVTF  | Delta:H(4)C(2)@N-term                | TM2D3_HUMAN  | TM2 domain-containing protein 3                                                   | 97.97      | 0.0722  |
| HLA-B5701 | CPGCSTGGARSW        | Dioxidation(C)@1; Cys->Dha(C)@4      | PDD2L_HUMAN  | Programmed cell death protein 2-like                                              | 99         | -0.0164 |
| HLA-B5701 | ISISTDGKICSWS       | Dioxidation(C)@10                    | DC112_HUMAN  | Cytoplasmic dynein 1 intermediate chain 2                                         | 99         | -0.0322 |
| HLA-B5701 | DQTQLLTLVCQLYQGKKP  | Dioxidation(C)@10                    | GILT_HUMAN   | Gamma-interferon-inducible lysosomal thiol reductase                              | 96.38      | -0.0005 |
| HLA-B5703 | VSDHEATLRCW         | Dioxidation(C)@10; Dioxidation(W)@11 | B5ARH3_HUMAN | MHC class I antigen                                                               | 99         | -0.0009 |
| HLA-B5801 | VSDHEATLRCWA        | Dioxidation(C)@10; Dioxidation(W)@11 | Q5QT34_HUMAN | HLA class I histocompatibility antigen, B-58 alpha chain                          | 98.98      | -0.0202 |
| HLA-B5801 | VSDHEATLRCW         | Dioxidation(C)@10; Dioxidation(W)@11 | Q5QT34_HUMAN | HLA class I histocompatibility antigen, B-58 alpha chain                          | 98.03      | -0.0003 |
| HLA-B5801 | VSDHEATLRCWA        | Dioxidation(C)@10; Oxidation(W)@11   | Q5QT34_HUMAN | HLA class I histocompatibility antigen, B-58 alpha chain                          | 99         | -0.0185 |
| HLA-B4403 | SCEFGSAKYY          | Dioxidation(C)@2                     | Q53HC3_HUMAN | Solute carrier family 25 member 3 isoform b variant (Fragment)                    | 98.46      | -0.0183 |
| HLA-B4403 | VCEEYIVKKL          | Dioxidation(C)@2                     | S35F2_HUMAN  | Solute carrier family 35 member F2                                                | 99         | -0.0103 |
| HLA-B5801 | SCVISSVGANEIW       | Dioxidation(C)@2                     | SDS3_HUMAN   | Sin3 histone deacetylase corepressor complex component SDS3                       | 99         | -0.0152 |
| HLA-B5701 | ACPGCSTGGARSW       | Dioxidation(C)@2; Cys->Dha(C)@5      | PDD2L_HUMAN  | Programmed cell death protein 2-like                                              | 99         | -0.0211 |
| HLA-B2705 | GRCGSVLVR           | Dioxidation(C)@3                     | RS2_HUMAN    | 40S ribosomal protein S2                                                          | 99         | -0.0138 |
| HLA-1502  | FLCGVMKTY           | Dioxidation(C)@3                     | Q6MZS5_HUMAN | Putative uncharacterized protein DKFZp686A13234 (Fragment)                        | 98.71      | 0.0033  |
| HLA-B5701 | SGTVCLDVINQTW       | Dioxidation(C)@5                     | UBE2H_HUMAN  | Ubiquitin-conjugating enzyme E2 H                                                 | 98.56      | -0.024  |
| HLA-B5801 | LAEVCTVLLR          | Dioxidation(C)@5                     | Q9UL32_HUMAN | Bcl-2 related ovarian killer                                                      | 99         | 0       |
| HLA-B5701 | TASVVCLLNNFY        | Dioxidation(C)@6                     | IGKC_HUMAN   | Ig kappa chain C region                                                           | 95.18      | -0.0051 |
| HLA-B5701 | TASVVCLLNNFYPRE     | Dioxidation(C)@6                     | Q8TCD0_HUMAN | Putative uncharacterized protein                                                  | 95.86      | -0.0019 |
| HLA-B5701 | HTAHIACKF           | Dioxidation(C)@7                     | EF1A1_HUMAN  | Elongation factor 1-alpha 1                                                       | 99         | 0.0093  |
| HLA-B2705 | SFDDLACVS           | Dioxidation(C)@8                     | ALG13_HUMAN  | UDP-N-acetylglucosamine transferase subunit ALG13 homolog                         | 98.99      | -0.012  |

|           |                   |                                        |              |                                                                                              |       |         |
|-----------|-------------------|----------------------------------------|--------------|----------------------------------------------------------------------------------------------|-------|---------|
| HLA-B5701 | SGTASVCLLNFFYPRE  | Dioxidation(C)@8                       | IGKC_HUMAN   | Ig kappa chain C region                                                                      | 98.58 | -0.0223 |
| HLA-B5701 | SFDDLIACVS        | Dioxidation(C)@8                       | ALG13_HUMAN  | UDP-N-acetylglucosamine transferase subunit ALG13 homolog                                    | 98.71 | -0.0215 |
| HLA-B5703 | SFDDLIACVS        | Dioxidation(C)@8                       | ALG13_HUMAN  | UDP-N-acetylglucosamine transferase subunit ALG13 homolog                                    | 99    | -0.0057 |
| HLA-B5801 | KCVQGILQC         | Dioxidation(C)@9                       | DYH6_HUMAN   | Dynein heavy chain 6, axonemal                                                               | 99    | 0.0626  |
| HLA-B5801 | SDHEATLRCW        | Dioxidation(C)@9                       | Q5QT34_HUMAN | HLA class I histocompatibility antigen, B-58 alpha chain                                     | 99    | -0.0098 |
| HLA-1502  | TLPEFFPVCFS       | Dioxidation(C)@9                       | VP13C_HUMAN  | Vacuolar protein sorting-associated protein 13C                                              | 97.39 | -0.0169 |
| HLA-A1    | YSDLASLGCISRY     | Dioxidation(C)@9                       | SC24A_HUMAN  | Protein transport protein Sec24A                                                             | 97.99 | -0.0187 |
| HLA-B5801 | SDHEATLRCWA       | Dioxidation(C)@9; Dioxidation(W)@10    | 1B58_HUMAN   | HLA class I histocompatibility antigen, B-58 alpha chain                                     | 99    | -0.0194 |
| HLA-B5801 | SDHEATLRCWA       | Dioxidation(C)@9; Oxidation(W)@10      | Q5QT34_HUMAN | HLA class I histocompatibility antigen, B-58 alpha chain                                     | 95.87 | -0.0208 |
| HLA-B5801 | VSDHEATLRCW       | Dioxidation(R)@9; Cys->Dha(C)@10       | Q5QT34_HUMAN | HLA class I histocompatibility antigen, B-58 alpha chain                                     | 96.89 | -0.0194 |
| HLA-B5801 | VSDHEATLRCW       | Dioxidation(R)@9; Dioxidation(C)@10    | Q5QT34_HUMAN | HLA class I histocompatibility antigen, B-58 alpha chain                                     | 97.64 | -0.0003 |
| HLA-B5801 | QNTETAAQCNAVE     | Gln->pyro-Glu@N-term; Glutathione(C)@9 | SAP_HUMAN    | Proactivator polypeptide Contains: Saposin-A                                                 | 99    | 0.0024  |
| HLA-B5801 | QNTETAAQCNAVEH    | Gln->pyro-Glu@N-term; Glutathione(C)@9 | SAP_HUMAN    | Proactivator polypeptide Contains: Saposin-A                                                 | 96.83 | -0.0093 |
| HLA-B5701 | VSDHEATLRCW       | Glutathione(C)@10                      | D9UAZ5_HUMAN | MHC class I antigen                                                                          | 98.8  | 0.0009  |
| HLA-B5701 | VSDHEATLRC        | Glutathione(C)@10                      | D9UAZ5_HUMAN | MHC class I antigen                                                                          | 98.74 | 0.0169  |
| HLA-B5701 | NTKGENINIC        | Glutathione(C)@10                      | THOC3_HUMAN  | THO complex subunit 3                                                                        | 99    | 0.0077  |
| HLA-B5703 | VSDHEATLRC        | Glutathione(C)@10                      | B5ARH3_HUMAN | MHC class I antigen                                                                          | 98.96 | 0.0172  |
| HLA-B5703 | ISDHEATLRC        | Glutathione(C)@10                      | Q95353_HUMAN | MHC class I HLA-Bw62                                                                         | 98.48 | 0.0158  |
| HLA-B5801 | GSLPLNAEACW       | Glutathione(C)@10                      | Q8N995_HUMAN | cDNA FLJ38173 fis, clone FCBBF1000053, highly similar to HYDROXYMETHYLGLUTARYL-COA SYNTHASE, | 97.55 | 0.0298  |
| HLA-B5801 | RAVREDLGGC        | Glutathione(C)@10                      | CC85B_HUMAN  | Coiled-coil domain-containing protein 85B                                                    | 99    | 0.0063  |
| HLA-B5801 | ISDHEATLRC        | Glutathione(C)@10                      | Q7YNX1_HUMAN | Leucocyte antigen B                                                                          | 99    | 0.0045  |
| HLA-B5801 | VSDHEATLRC        | Glutathione(C)@10                      | Q5QT34_HUMAN | HLA class I histocompatibility antigen, B-58 alpha chain                                     | 97.8  | 0.0145  |
| HLA-B5801 | VSDHEATLRCW       | Glutathione(C)@10                      | Q5QT34_HUMAN | HLA class I histocompatibility antigen, B-58 alpha chain                                     | 96.82 | -0.0009 |
| HLA-B5801 | ISDHEATLRCW       | Glutathione(C)@10                      | D9UAZ9_HUMAN | MHC class I antigen                                                                          | 96.83 | -0.0009 |
| HLA-B4403 | MEFDPNSNPPCY      | Glutathione(C)@11                      | RPB7_HUMAN   | DNA-directed RNA polymerase II subunit RPB7                                                  | 99    | 0.0024  |
| HLA-B5801 | DSNVTASPTAPACPS   | Glutathione(C)@13                      | TNIP1_HUMAN  | TNFAIP3-interacting protein 1                                                                | 99    | -0.0063 |
| HLA-B5703 | RAKCFEKNEAIQAAHDA | Glutathione(C)@4                       | UCHL1_HUMAN  | Ubiquitin carboxyl-terminal hydrolase isozyme L1                                             | 98.39 | -0.0086 |
| HLA-1502  | TQACVGTTY         | Glutathione(C)@4                       | WDR25_HUMAN  | WD repeat-containing protein 25                                                              | 98.84 | -0.0013 |
| HLA-B5703 | VTLTCLLNF         | Glutathione(C)@5                       | Q0EAF5_HUMAN | CD22 antigen                                                                                 | 96.2  | -0.0048 |
| HLA-B5703 | ASMQCVLTF         | Glutathione(C)@5                       | GLE1_HUMAN   | Nucleoporin GLE1                                                                             | 99    | 0       |
| HLA-B5703 | SSASCANNAF        | Glutathione(C)@5                       | TISD_HUMAN   | Zinc finger protein 36, C3H1 type-like 2                                                     | 99    | 0.0013  |
| HLA-A1    | ASEVCPPPGY        | Glutathione(C)@5                       | PIAS3_HUMAN  | E3 SUMO-protein ligase PIAS3                                                                 | 98.37 | -0.0059 |
| HLA-B2705 | IFDLSCMGF         | Glutathione(C)@6                       | CK5P2_HUMAN  | CDK5 regulatory subunit-associated protein 2                                                 | 99    | 0.0046  |
| HLA-B5701 | IFDLSCMGF         | Glutathione(C)@6                       | CK5P2_HUMAN  | CDK5 regulatory subunit-associated protein 2                                                 | 98.63 | -0.0071 |
| HLA-B5701 | KTAVICQLDYW       | Glutathione(C)@6                       | HERC5_HUMAN  | E3 ISG15--protein ligase HERC5                                                               | 98.72 | 0.0017  |
| HLA-B5801 | KTIDICHDFGW       | Glutathione(C)@6                       | DHCR7_HUMAN  | 7-dehydrocholesterol reductase                                                               | 99    | -0.0051 |
| HLA-B5801 | STDGSCTVRW        | Glutathione(C)@6                       | Q5VTU4_HUMAN | Dynein, light chain                                                                          | 99    | -0.0125 |
| HLA-B5801 | KTAVICQLDYW       | Glutathione(C)@6                       | HERC5_HUMAN  | E3 ISG15--protein ligase HERC5                                                               | 99    | 0.0025  |
| HLA-B5801 | IFDLSCMGF         | Glutathione(C)@6                       | Q7Z3M0_HUMAN | Putative uncharacterized protein DKFZp686M1993                                               | 99    | -0.002  |
| HLA-1502  | IFDLSCMGF         | Glutathione(C)@6                       | F8WC13_HUMAN | CDK5 regulatory subunit associated protein 2                                                 | 99    | 0.0021  |
| HLA-A1    | LADLSCLVY         | Glutathione(C)@6                       | ERH_HUMAN    | Enhancer of rudimentary homolog                                                              | 97.01 | 0.0013  |
| HLA-A1    | NSELSCQLY         | Glutathione(C)@6                       | TYSY_HUMAN   | Thymidylate synthase                                                                         | 94.34 | -0.0026 |
| HLA-B2705 | YYDAIACL          | Glutathione(C)@7                       | AIP_HUMAN    | AH receptor-interacting protein                                                              | 98.16 | 0.0051  |
| HLA-B5701 | SSIQDLCVTW        | Glutathione(C)@7                       | CNDG2_HUMAN  | Condensin-2 complex subunit G2                                                               | 99    | 0.0014  |
| HLA-B5701 | RVYQSLCPTSW       | Glutathione(C)@7                       | CX6B1_HUMAN  | Cytochrome c oxidase subunit 6B1                                                             | 98.78 | -0.0024 |
| HLA-B5701 | SSIDTTCTIW        | Glutathione(C)@7                       | DCAF7_HUMAN  | DDB1- and CUL4-associated factor 7                                                           | 98.26 | -0.0021 |
| HLA-B5703 | SSIDTTCTIW        | Glutathione(C)@7                       | DCAF7_HUMAN  | DDB1- and CUL4-associated factor 7                                                           | 97.97 | -0.0021 |
| HLA-B5801 | SSIQDLCVTW        | Glutathione(C)@7                       | CNDG2_HUMAN  | Condensin-2 complex subunit G2                                                               | 99    | -0.0035 |

|           |                 |                                    |              |                                                                            |       |         |
|-----------|-----------------|------------------------------------|--------------|----------------------------------------------------------------------------|-------|---------|
| HLA-B5801 | SSIDTTCTIW      | Glutathione(C)@7                   | DCAF7_HUMAN  | DDB1- and CUL4-associated factor 7                                         | 96.15 | 0.0022  |
| HLA-B5801 | KVFDPSGLPYW     | Glutathione(C)@7                   | Q4VY28_HUMAN | Polyglutamine binding protein variant 12                                   | 99    | -0.0007 |
| HLA-B5801 | FSEADACELW      | Glutathione(C)@7                   | SPTB2_HUMAN  | Spectrin beta chain, brain 1                                               | 99    | 0.0057  |
| HLA-1502  | SVSGAGCTTY      | Glutathione(C)@7                   | CE051_HUMAN  | UPF0600 protein C5orf51                                                    | 99    | -0.0012 |
| HLA-B2705 | HFDDTVVCL       | Glutathione(C)@8                   | HNRPU_HUMAN  | Heterogeneous nuclear ribonucleoprotein U                                  | 96.56 | 0.0088  |
| HLA-B5701 | TSSIDTTCTIW     | Glutathione(C)@8                   | DCAF7_HUMAN  | DDB1- and CUL4-associated factor 7                                         | 99    | -0.0025 |
| HLA-B5701 | QTSSIVECW       | Glutathione(C)@8                   | MED16_HUMAN  | Mediator of RNA polymerase II transcription subunit 16                     | 95.5  | 0.0039  |
| HLA-B5701 | GTSLLIGCILY     | Glutathione(C)@8                   | SERC5_HUMAN  | Serine incorporator 5                                                      | 95.88 | -0.0033 |
| HLA-B5701 | HFDDTVVCL       | Glutathione(C)@8                   | Q96BA7_HUMAN | HNRPU protein                                                              | 99    | -0.0021 |
| HLA-B5701 | RAYLEGLCWEV     | Glutathione(C)@8                   | Q29669_HUMAN | MHC class I antigen HLA-B35                                                | 99    | -0.002  |
| HLA-B5703 | HFDDTVVCL       | Glutathione(C)@8                   | B4DLR3_HUMAN | cDNA FLJ54020, highly similar to Heterogeneous nuclear ribonucleoprotein U | 99    | -0.0008 |
| HLA-B5703 | LSPDVTPCF       | Glutathione(C)@8                   | CC50A_HUMAN  | Cell cycle control protein 50A                                             | 95.74 | 0.0149  |
| HLA-B5703 | TSSIDTTCTIW     | Glutathione(C)@8                   | DCAF7_HUMAN  | DDB1- and CUL4-associated factor 7                                         | 98.24 | -0.01   |
| HLA-B5703 | QTSSIVECW       | Glutathione(C)@8                   | MED16_HUMAN  | Mediator of RNA polymerase II transcription subunit 16                     | 97.87 | -0.001  |
| HLA-B5703 | GSAKDLICTHF     | Glutathione(C)@8                   | STRAA_HUMAN  | STE20-related kinase adapter protein alpha                                 | 99    | -0.0019 |
| HLA-B5801 | ISDPLQQCF       | Glutathione(C)@8                   | TRIP4_HUMAN  | Activating signal cointegrator 1                                           | 97.65 | 0.0067  |
| HLA-B5801 | TSSIDTTCTIW     | Glutathione(C)@8                   | DCAF7_HUMAN  | DDB1- and CUL4-associated factor 7                                         | 97.06 | 0.0034  |
| HLA-B5801 | HFDDTVVCL       | Glutathione(C)@8                   | Q96BA7_HUMAN | HNRPU protein                                                              | 96.61 | -0.0011 |
| HLA-B5801 | QTSSIVECW       | Glutathione(C)@8                   | MED16_HUMAN  | Mediator of RNA polymerase II transcription subunit 16                     | 98.51 | -0.0039 |
| HLA-B5801 | RAYLEGLCWEV     | Glutathione(C)@8                   | Q5QT34_HUMAN | HLA class I histocompatibility antigen, B-58 alpha chain                   | 98.06 | -0.0022 |
| HLA-1502  | FMDESTQCF       | Glutathione(C)@8                   | Q5JW58_HUMAN | Chromosome 20 open reading frame 172 (Fragment)                            | 96.71 | 0.0066  |
| HLA-1502  | TQSNAILCY       | Glutathione(C)@8                   | GSTM1_HUMAN  | Glutathione S-transferase Mu 1                                             | 96.68 | -0.0011 |
| HLA-1502  | HFDDTVVCL       | Glutathione(C)@8                   | B3KX72_HUMAN | Uncharacterized protein                                                    | 96.84 | -0.0022 |
| HLA-A1    | LSELAALCY       | Glutathione(C)@8                   | RBP2_HUMAN   | E3 SUMO-protein ligase RanBP2                                              | 95.57 | -0.0051 |
| HLA-B5701 | GTSSIDTTCTI     | Glutathione(C)@9                   | DCAF7_HUMAN  | DDB1- and CUL4-associated factor 7                                         | 96.96 | 0.0136  |
| HLA-B5701 | LALFNPDVC       | Glutathione(C)@9                   | NDUA4_HUMAN  | NADH dehydrogenase [ubiquinone] 1 alpha subcomplex subunit 4               | 96.6  | 0.0155  |
| HLA-B5701 | SDHEATLRC       | Glutathione(C)@9                   | D9UAZ5_HUMAN | MHC class I antigen                                                        | 99    | 0.0151  |
| HLA-B5703 | SDHEATLRC       | Glutathione(C)@9                   | Q95353_HUMAN | MHC class I HLA-Bw62                                                       | 97.34 | 0.0119  |
| HLA-B5703 | GTSSIDTTCTI     | Glutathione(C)@9                   | DCAF7_HUMAN  | DDB1- and CUL4-associated factor 7                                         | 98    | 0.0111  |
| HLA-B5703 | GTSSIDTTCTIW    | Glutathione(C)@9                   | DCAF7_HUMAN  | DDB1- and CUL4-associated factor 7                                         | 99    | -0.0015 |
| HLA-B5703 | LALFNPDVC       | Glutathione(C)@9                   | NDUA4_HUMAN  | NADH dehydrogenase [ubiquinone] 1 alpha subcomplex subunit 4               | 98.06 | 0.0064  |
| HLA-B5801 | TGIYSSTSCHKTPDK | Glutathione(C)@9                   | Q96NY6_HUMAN | Cathepsin H                                                                | 99    | 0.0019  |
| HLA-B5801 | GTSSIDTTCTIW    | Glutathione(C)@9                   | DCAF7_HUMAN  | DDB1- and CUL4-associated factor 7                                         | 99    | 0.0029  |
| HLA-B5801 | SDHEATLRC       | Glutathione(C)@9                   | Q5QT34_HUMAN | HLA class I histocompatibility antigen, B-58 alpha chain                   | 96.68 | 0.0121  |
| HLA-B5801 | SDHEATLRCW      | Glutathione(C)@9                   | C9E8V1_HUMAN | MHC class I antigen                                                        | 97.93 | -0.0085 |
| HLA-A1    | FMDVKCPGCV      | Methyl(C)@9                        | RS27_HUMAN   | 40S ribosomal protein S27                                                  | 99    | -0.0021 |
| HLA-B5701 | LTKPIVCWC       | Oxidation(C)@7                     | ACLY_HUMAN   | ATP-citrate synthase                                                       | 98.03 | -0.0049 |
| HLA-B5801 | CTLSSACLIGDAW   | Oxidation(C)@7                     | WDR6_HUMAN   | WD repeat-containing protein 6                                             | 97.14 | -0.0011 |
| HLA-B5701 | PPPPPPPC        | Oxidation(C)@8                     | Q8IXZ1_HUMAN | Homeobox D8                                                                | 99    | 0.0436  |
| HLA-B5801 | PPPPPPPC        | Oxidation(C)@8                     | Q8IXZ1_HUMAN | Homeobox D8                                                                | 98.76 | 0.0444  |
| HLA-B5801 | VSDHEATLRCW     | Oxidation(R)@9; Dioxidation(C)@10  | Q5QT34_HUMAN | HLA class I histocompatibility antigen, B-58 alpha chain                   | 99    | 0.0014  |
| HLA-B5801 | VSDHEATLRCWA    | Trioxidation(C)@10                 | Q5QT34_HUMAN | HLA class I histocompatibility antigen, B-58 alpha chain                   | 99    | -0.0173 |
| HLA-B5801 | VSDHEATLRCW     | Trioxidation(C)@10                 | Q5QT34_HUMAN | HLA class I histocompatibility antigen, B-58 alpha chain                   | 99    | 0.0014  |
| HLA-B5801 | LAECTVLLR       | Trioxidation(C)@5                  | Q9UL32_HUMAN | Bcl-2 related ovarian killer                                               | 99    | 0.0006  |
| HLA-B5701 | TASVVCLNNFYPRE  | Trioxidation(C)@6                  | Q8TCD0_HUMAN | Putative uncharacterized protein                                           | 99    | -0.0003 |
| HLA-B5801 | SDHEATLRCWA     | Trioxidation(C)@9; Oxidation(W)@10 | 1C04_HUMAN   | HLA class I histocompatibility antigen, Cw-4 alpha chain                   | 99    | -0.0264 |
| HLA-B5801 | SDHEATLRCW      | Trioxidation(C)@9; Oxidation(W)@10 | 1C04_HUMAN   | HLA class I histocompatibility antigen, Cw-4 alpha chain                   | 97.17 | -0.0021 |

MOUSE CELLS AND TISSUES

| Allele     | Peptide                         | Modification                         | Accession   | Protein                                             | Confidence |         |
|------------|---------------------------------|--------------------------------------|-------------|-----------------------------------------------------|------------|---------|
| NIT IFN Db | SAIVNLPGCSA                     | Glutathione(C)@9                     | COPG_MOUSE  | Coatomer subunit gamma                              | 99         | 0.002   |
| NIT IFN Db | GAIRNACQML                      | Glutathione(C)@7                     | CUL3_MOUSE  | Cullin-3                                            | 93         | 0.0049  |
| NIT IFN Db | SGIRNQGGTCYL                    | Glutathione(C)@10                    | UBP40_MOUSE | Ubiquitin carboxyl-terminal hydrolase 40            | 98.43      | 0.0051  |
| NIT IFN Db | AALCNVCEL                       | Glutathione(C)@7                     | CD041_MOUSE | UPF0636 protein C4orf41 homolog                     | 99         | -0.0005 |
| NIT IFN Db | GQCSSVNIHYL                     | Dehydro(C)@3                         | ZRAB3_MOUSE | Zinc finger Ran-binding domain-containing protein 3 | 99         | -0.0695 |
| NIT IFN Kd | LYHNLCTSL                       | Glutathione(C)@6                     | MCM6_MOUSE  | DNA replication licensing factor MCM6               | 97.84      | -0.0013 |
| NIT IFN Kd | QYEKVKCKDL                      | Cys->Dha(C)@6                        | KI20B_MOUSE | Kinesin-like protein KIF20B                         | 99         | -0.0388 |
| NIT IFN Kd | SYNCLLCV                        | Glutathione(C)@4                     | VIR_MOUSE   | Protein virilizer homolog                           | 92.06      | -0.0066 |
| NOD thymus | SGLCNEDHL                       | Trioxidation(C)@4                    | NED4L_MOUSE | E3 ubiquitin-protein ligase NEDD4-like              | 99         | -0.0032 |
| NOD thymus | AAIRNSITSC                      | Trioxidation(C)@10                   | FOXN3_MOUSE | Forkhead box protein N3                             | 99         | -0.0044 |
| NOD thymus | VAVNNTCECL                      | Glutathione(C)@8                     | ZFY16_MOUSE | Zinc finger FYVE domain-containing protein 16       | 99         | 0.0006  |
| NOD spleen | [ NMCRQCFRQYAKDIGIKLD           | Dioxidation(C)@3; Cys->Dha(C)@6      | RS29_MOUSE  | 40S ribosomal protein S29                           | 99         | -0.017  |
| NOD spleen | [ VHLTDAEKAAVSLWGVNSDEVGGEALGRL | Cys->Dha(C)@13; Trp->Kynurenin(W)@15 | HBB1_MOUSE  | Hemoglobin subunit beta-1                           | 99         | -0.0238 |
| NOD thymus | FYLPGLAPVNFCAEEKSNECKADIELFVNR  | Dioxidation(C)@12; Cys->Dha(C)@20    | TM9S2_MOUSE | Transmembrane 9 superfamily member 2                | 98.95      | -0.0345 |
| NOD spleen | kTYSTVGPSC                      | Glutathione(C)@9                     | OBF1_MOUSE  | POU domain class 2-associating factor 1             | 99         | 0.0007  |
| NOD spleen | kVIGGLCHSSI                     | Cys->Dha(C)@6                        | GRP1_MOUSE  | RAS guanyl-releasing protein 1                      | 99         | 0.0277  |
